# Supplementary material for: Unraveling differences in fecal microbiota stability in mammals: from high variable carnivores and consistently stable herbivores
Source: Anim Microbiome. 2021 Nov 4;3:77. doi: 10.1186/s42523-021-00141-0 (PMC8567652; doi:10.1186/s42523-021-00141-0)
Supplement: Supplementary file 2 — Additional file 2. Taxonomic assignment. Taxonomic assignment according to SILVA database (version 1.38) provided for each species. Furthermore, the microbial composition for all samples of one representative species per analyzed (sub-)order is shown. Those representatives are the brown bear (Canoidea), lion (Feloidea), wildebeest (Ruminantia) and plains zebra (Perissodactyla). [file 42523_2021_141_MOESM2_ESM.xlsx]

## Sheet: Taxonomy_averagespecies_5%
Species	Other (<5%)	Euryarchaeota_Methanobacteriaceae	Bacteroidetes_unclassified(p-251-o5)	Bacteroidetes_Bacteroidaceae	Bacteroidetes_Rikenellaceae	Firmicutes_Acidaminococcaceae	Firmicutes_Clostridiaceae	Firmicutes_Erysipelotrichaceae	Firmicutes_Lachnospiraceae	Firmicutes_Oscillospiraceae	Firmicutes_Peptostreptococcaceae	Firmicutes_Planococcaceae	Fusobacteria_Fusobacteriaceae	Proteobacteria_Enterobacteriaceae	Proteobacteria_Moraxellaceae	Spirochaetes_Spirochaetaceae	Verrucomicrobiota_Akkermansiaceae
Reindeer	8.08171	0	0	15.8893	16.8538	5.02366	0	0	18.9372	19.6763	0	0	0	0	0	8.98126	0
Okapi	17.4273	0	0	11.6066	19.1274	0	0	0	10.2488	13.8251	0	0	0	0	0	14.953	5.54758
Giraffe	12.9051	0	8.66934	11.5162	15.9669	0	0	0	12.0433	15.9779	0	0	0	0	0	14.2858	0
Wildebeest	18.2651	17.5402	0	6.85201	11.1012	0	0	0	9.45953	13.1239	9.42175	8.31573	0	0	0	0	5.9205
Watussi	17.1922	0	0	7.0656	17.5619	0	0	0	7.94524	13.8756	15.6623	5.12208	0	0	9.71592	0	5.8591
Eland_antilope	19.0634	18.6217	0	6.01673	9.84367	0	0	0	9.09202	10.3653	6.51902	11.5989	0	0	0	8.8793	0
Bongo	11.605	0	0	12.4905	22.407	0	0	0	10.3207	16.6384	0	0	0	0	0	12.4492	5.39
AV (Ruminant)	14.9343	5.16599	1.23848	10.2053	16.1231	0.717665	0	0	11.1495	14.7832	4.51472	3.57667	0	0	1.38799	8.50695	3.24531
SD (Ruminant)	3.81008	8.17325	3.03364	3.37762	4.06715	1.75791	0	0	3.38698	2.74706	5.78045	4.47809	0	0	3.39986	5.80135	2.81539
Grevys_zebra	19.3657	0	20.2707	0	11.3111	0	0	0	18.3028	5.25086	0	0	0	0	0	25.4988	0
Plains_zebra	20.1091	0	13.2467	0	13.5295	0	0	0	21.136	6.9457	0	0	0	0	0	25.033	0
Mountain_zebra	12.0663	5.87549	16.329	0	11.006	0	0	0	24.0809	8.87838	0	0	0	0	0	21.7639	0
Tapir	7.31321	0	0	6.66435	5.85544	5.78934	0	0	14.148	14.2507	0	0	0	0	0	23.7819	11.9823
Black_rhinoceros	14.8231	0	0	0	18.488	0	0	0	17.7488	15.7711	0	13.0987	0	0	0	14.3846	0
White_rhinoceros	7.05062	0	8.22052	0	15.5851	0	0	0	25.717	6.39152	0	0	0	0	0	28.5875	0
AV(Periss.)	13.4547	0.979249	9.67781	1.11072	12.6292	0.964889	0	0	20.1889	9.58137	0	2.18311	0	0	0	23.175	1.99704
SD(Periss.)	5.19217	2.18967	7.73119	2.48366	3.96083	2.15756	0	0	3.92869	4.01008	0	4.88159	0	0	0	4.43054	4.46552
AV Total (Herbivore)	14.2514	3.23365	5.13356	6.00779	14.5105	0.831769	0	0	15.3216	12.3824	2.431	2.93349	0	0	0.747378	15.2768	2.66919
SD Total (Herbivore)	4.56105	6.52223	7.08819	5.43556	4.37969	1.95644	0	0	5.7972	4.26733	4.80182	4.72006	0	0	2.58899	8.98061	3.72274
Fossa	6.09442	0	0	0	0	0	26.4805	0	10.0747	0	32.9526	6.85752	12.1365	5.40385	0	0	0
Meerkat	11.087	0	0	14.659	0	0	18.6728	0	13.7324	0	17.7693	0	10.4755	0	13.604	0	0
Cheetah	9.62542	0	0	17.6977	0	0	21.0425	0	11.752	0	8.61926	0	31.2631	0	0	0	0
Clouded_leopard	10.3697	0	0	17.2873	0	0	8.49443	0	19.2119	0	13.2875	0	23.904	7.44509	0	0	0
Tiger	5.00484	0	0	16.8712	0	0	15.8249	0	11.2116	0	11.5101	0	27.9574	11.6201	0	0	0
Snow_leopard	5.99809	0	0	13.2206	0	0	15.935	0	12.3744	0	15.5288	0	31.8135	5.1295	0	0	0
Jaguar	11.9846	0	0	16.3015	0	0	10.3648	0	15.8734	0	15.6918	0	22.3425	7.44132	0	0	0
Leopard	8.19117	0	0	14.6038	0	0	8.97993	0	20.4643	0	13.3076	0	23.7415	10.7117	0	0	0
Lion	6.92573	0	0	16.1176	0	0	10.8629	7.46518	11.1045	0	15.1599	0	24.7495	7.61465	0	0	0
AV (Feloidea)	8.36456	0	0	14.0843	0	0	15.1842	0.829465	13.9777	0	15.9808	0.761947	23.1537	6.1518	1.51155	0	0
SD (Feloidea)	2.36335	0	0	5.16233	0	0	5.77558	2.34608	3.52438	0	6.50453	2.15511	7.07153	3.85089	4.27531	0	0
Red_Panda	8.55671	0	0	0	0	0	35.094	16.4679	0	0	0	14.5733	0	25.3081	0	0	0
Polar_bear	5.57556	0	0	0	0	0	36.0505	0	0	0	15.0796	0	20.6259	22.6684	0	0	0
Brown_bear	7.31941	0	0	0	0	0	31.0148	13.7465	0	0	21.3444	0	0	20.3784	6.19655	0	0
Maned_wolf	2.93118	0	0	15.5359	0	0	15.392	0	6.20624	0	14.0295	0	35.2895	10.6157	0	0	0
Bush_dog	8.43007	0	0	22.1121	0	0	6.77404	0	12.791	0	9.46585	0	33.5911	6.83584	0	0	0
African_wild_dog	17.2132	0	0	12.2912	0	0	9.85106	6.01392	9.49817	0	9.50348	0	24.147	0	11.482	0	0
Bat_eared_fox	17.2286	0	0	28.0626	0	0	5.96183	0	8.33361	0	0	0	29.6288	10.7846	0	0	0
Arctic_fox	24.5742	0	0	30.975	0	6.70877	0	0	11.0408	0	0	0	26.7012	0	0	0	0
Fennec_fox	15.9144	0	0	19.1476	0	0	8.83081	0	13.2927	0	7.38457	0	35.4299	0	0	0	0
AV (Canoidea)	11.9715	0	0	14.236	0	0.745419	16.5521	4.02537	6.79584	0	8.53415	1.61926	22.8237	10.7323	1.96429	0	0
SD (Canoidea)	6.64971	0	0	11.4066	0	2.10836	12.999	6.24048	5.21469	0	7.13962	4.57995	13.081	9.47932	3.88027	0	0
AV Total (Carnivore)	10.168	0	0	14.1602	0	0.372709	15.8682	2.42742	10.3868	0	12.2575	1.1906	22.9887	8.44207	1.73792	0	0
SD Total (Carnivore)	5.30608	0	0	8.85356	0	1.53672	10.0813	4.97768	5.71855	0	7.77847	3.60472	10.516	7.58872	4.08884	0	0

## Sheet: Taxonomy_brown_bear
Species	Other (<5%)	Actinobacteria_Corynebacteriaceae	Actinobacteria_Micrococcaceae	Firmicutes_Bacillaceae	Firmicutes_Carnobacteriaceae	Firmicutes_Clostridiaceae	Firmicutes_Enterococcaceae	Firmicutes_Erysipelotrichaceae	Firmicutes_Lachnospiraceae	Firmicutes_Leuconostocaceae	Firmicutes_Peptostreptococcaceae	Firmicutes_Planococcaceae	Firmicutes_Staphylococcaceae	Firmicutes_Streptococcaceae	Fusobacteria_Fusobacteriaceae	Proteobacteria_Enterobacteriaceae	Proteobacteria_Erwiniaceae	Proteobacteria_Hafniaceae	Proteobacteria_Moraxellaceae	Proteobacteria_Morganellaceae
Zoo4_Sample11	1.19174	0	0	0	0	21.465	9.77665	16.6135	0	0	24.9175	0	0	0	0	26.0356	0	0	0	0
Zoo4_Sample10	3.51832	0	0	0	0	53.8536	0	19.0495	0	0	23.5786	0	0	0	0	0	0	0	0	0
Zoo4_Sample9	7.30311	0	0	0	0	22.9739	0	33.0014	0	0	36.7216	0	0	0	0	0	0	0	0	0
Zoo4_Sample8	11.968	0	0	0	0	30.314	8.31675	21.3341	0	0	19.1223	0	0	0	0	8.9448	0	0	0	0
Zoo4_Sample7	16.695	0	0	0	0	53.3885	0	0	0	0	29.9165	0	0	0	0	0	0	0	0	0
Zoo4_Sample6	9.95191	0	0	0	0	19.6419	8.59952	44.0366	0	0	11.9054	0	0	0	0	5.86467	0	0	0	0
Zoo4_Sample5	10.5906	0	0	0	0	31.9799	0	5.94924	0	0	38.131	0	0	7.70139	0	5.64789	0	0	0	0
Zoo4_Sample4	9.52247	0	0	0	0	28.9012	0	16.7712	0	0	34.8866	0	0	9.91859	0	0	0	0	0	0
Zoo4_Sample3	6.61434	0	0	0	0	62.4533	0	0	0	0	30.9323	0	0	0	0	0	0	0	0	0
Zoo4_Sample2	3.85338	0	0	0	0	12.2963	23.8564	9.36183	0	0	23.9833	0	0	16.8655	0	9.78322	0	0	0	0
Zoo4_Sample1	30.2619	6.20866	5.76767	0	0	0	0	0	0	0	0	0	35.84	0	0	0	0	0	21.9218	0
Zoo3_Sample7	10.9312	0	0	0	9.14486	0	29.6252	5.38478	0	0	0	0	0	0	0	0	11.8856	0	33.0284	0
Zoo3_Sample6	1.49654	0	0	0	0	29.0957	20.3772	16.9684	0	0	32.0623	0	0	0	0	0	0	0	0	0
Zoo3_Sample5	4.30814	0	0	0	0	14.5705	22.125	15.0288	0	7.42085	13.7838	0	0	22.7629	0	0	0	0	0	0
Zoo3_Sample4	7.48312	0	0	0	0	10.8824	11.5392	8.21848	0	0	15.5814	0	0	0	0	0	22.0747	0	24.2207	0
Zoo3_Sample3	0.468517	0	0	13.8235	0	30.1865	27.949	8.03923	0	0	19.5332	0	0	0	0	0	0	0	0	0
Zoo3_Sample2	8.68152	0	0	0	0	0	28.2903	0	0	24.904	0	0	12.4579	25.6663	0	0	0	0	0	0
Zoo3_Sample1	4.63409	0	0	30.4156	0	36.7879	7.46421	12.6388	0	0	8.05945	0	0	0	0	0	0	0	0	0
Zoo2_Sample6	11.455	0	0	0	0	22.6663	0	7.05796	0	0	7.13809	0	0	0	0	51.6827	0	0	0	0
Zoo2_Sample5	12.6686	0	0	0	0	10.3052	0	9.52062	12.5921	0	7.45383	0	0	0	0	47.4596	0	0	0	0
Zoo2_Sample4	14.5046	0	0	0	0	12.9463	0	0	0	0	0	7.79154	0	0	0	64.7575	0	0	0	0
Zoo2_Sample3	4.98581	0	0	0	0	29.8879	0	15.9168	26.4964	0	9.87704	0	0	0	0	12.8361	0	0	0	0
Zoo2_Sample2	4.71961	0	0	0	0	44.1851	0	15.4174	12.4263	0	16.4051	0	0	0	0	6.84642	0	0	0	0
Zoo2_Sample1	3.97141	0	0	0	0	20.8482	0	0	12.0761	0	8.25973	0	0	0	0	29.5934	0	19.0075	0	6.24368
Zoo1_Sample7	13.3717	0	0	0	0	19.0978	0	0	0	0	0	0	0	0	43.9023	13.6948	0	9.93343	0	0
Zoo1_Sample6	9.20049	0	0	0	0	25.607	0	0	0	0	0	0	0	0	42.7419	16.7187	0	5.73188	0	0
Zoo1_Sample5	5.88994	0	0	0	0	24.4976	0	0	0	0	5.5823	0	0	0	34.4068	9.38818	0	20.2352	0	0
Zoo1_Sample4	6.5479	0	0	0	0	22.0712	0	6.19889	0	0	22.6442	0	0	0	0	42.5379	0	0	0	0

## Sheet: Taxonomy_lion
Sample	Other (<5%)	Actinobacteria_Coriobacteriaceae	Bacteroidetes_Bacteroidaceae	Bacteroidetes_Prevotellaceae	Bacteroidetes_Tannerellaceae	Firmicutes_unclassified	Firmicutes_Planococcaceae	Firmicutes_Erysipelotrichaceae	Firmicutes_Lactobacillaceae	Firmicutes_Vagococcaceae	Firmicutes_Clostridiaceae	Firmicutes_Lachnospiraceae	Firmicutes_Oscillospiraceae	Firmicutes_Peptostreptococcaceae	Firmicutes_Selenomonadaceae	Firmicutes_Veillonellaceae	Fusobacteria_Fusobacteriaceae	Proteobacteria_Sutterellaceae	Proteobacteria_Enterobacteriaceae	Proteobacteria_Morganellaceae	Proteobacteria_Moraxellaceae	Proteobacteria_Pseudomonadaceae
Zoo6_Sample6	10.8821	0	0	0	0	0	0	0	0	0	0	0	0	0	0	0	0	0	26.3957	17.9028	18.6049	26.2145
Zoo6_Sample5	11.3693	0	12.1653	0	0	0	0	0	0	0	0	17.4962	0	9.33032	0	0	25.2985	0	24.3404	0	0	0
Zoo5_Sample4	20.9061	0	25.2996	10.0345	0	0	0	0	0	0	7.30973	11.2491	0	7.14559	0	0	18.0555	0	0	0	0	0
Zoo5_Sample3	17.3988	0	25.0134	0	0	0	0	0	0	0	0	15.0038	0	5.47739	0	0	16.8618	8.07647	12.1684	0	0	0
Zoo5_Sample2	13.8684	0	24.6463	15.8701	0	0	0	0	0	0	5.98553	0	0	5.37915	0	0	29.1452	0	5.1053	0	0	0
Zoo5_Sample1	8.94424	0	18.314	9.7775	0	0	0	0	0	0	0	0	0	0	0	0	20.9645	0	41.9998	0	0	0
Zoo4_Sample11	13.1393	0	19.923	0	0	0	0	14.3371	0	0	6.7217	9.13605	0	9.60154	0	0	21.6423	5.49901	0	0	0	0
Zoo4_Sample10	15.8428	7.0446	0	0	0	0	0	29.0476	0	0	5.17763	11.6704	0	12.9781	9.15344	0	9.08541	0	0	0	0	0
Zoo4_Sample9	12.3585	0	17.7877	0	5.64212	0	0	6.93893	0	0	0	7.70347	0	8.6906	5.62276	0	35.256	0	0	0	0	0
Zoo4_Sample8	22.5856	0	26.9565	0	0	0	0	0	0	0	0	0	0	0	12.6318	0	37.8261	0	0	0	0	0
Zoo4_Sample7	27.6742	0	9.76812	24.395	0	0	0	7.13338	0	0	0	7.4177	0	0	0	0	23.6115	0	0	0	0	0
Zoo4_Sample6	9.50815	5.16331	18.8289	0	0	0	0	0	0	0	0	9.79882	0	9.39723	7.62258	0	39.681	0	0	0	0	0
Zoo4_Sample5	22.538	0	8.8174	0	12.2848	0	0	0	0	0	0	0	0	0	11.0575	0	39.9643	5.3381	0	0	0	0
Zoo4_Sample4	14.5572	12.6423	0	0	0	0	0	20.2945	0	0	5.50519	10.7928	0	22.6735	13.5345	0	0	0	0	0	0	0
Zoo4_Sample3	9.27824	8.03191	0	0	0	0	0	17.1107	0	0	19.4871	16.0417	0	16.6067	6.68033	0	6.76342	0	0	0	0	0
Zoo4_Sample2	11.0129	10.1054	0	0	0	0	0	15.5211	0	0	19.034	8.39578	0	13.7002	6.25293	0	15.9778	0	0	0	0	0
Zoo4_Sample1	16.4551	0	7.71672	0	0	0	0	6.06041	0	0	14.6338	0	0	11.4608	8.89072	0	34.7823	0	0	0	0	0
Zoo3_Sample3	17.9746	0	0	0	0	18.3816	0	0	0	10.3549	18.7073	0	0	27.6132	0	0	0	0	6.96841	0	0	0
Zoo3_Sample2	28.3818	0	0	0	0	6.6804	0	0	0	0	14.3474	12.8338	0	31.5952	0	0	0	0	6.16134	0	0	0
Zoo3_Sample1	19.2988	6.00902	0	0	0	19.2786	10.5175	0	0	0	12.9937	12.1324	0	19.7699	0	0	0	0	0	0	0	0
Zoo2_Sample6	23.9981	0	6.2419	0	0	0	0	0	0	0	6.63591	15.9676	0	19.4982	0	0	18.7361	0	8.92218	0	0	0
Zoo2_Sample5	17.0817	0	42.9598	0	0	0	0	0	6.03448	0	0	20.3384	0	0	0	0	13.5856	0	0	0	0	0
Zoo2_Sample4	20.4468	0	0	0	0	0	0	0	0	0	28.5806	5.34121	12.2103	12.7496	0	0	20.6715	0	0	0	0	0
Zoo2_Sample3	19.8184	0	30.1816	0	0	0	0	0	14.8304	0	0	11.419	0	0	0	0	16.6144	0	7.13627	0	0	0
Zoo2_Sample2	18.4672	0	14.9285	0	6.8841	0	0	0	14.2903	0	0	0	0	7.7285	9.4173	8.65025	19.6339	0	0	0	0	0
Zoo2_Sample1	18.881	0	27.607	0	7.60193	0	0	0	12.2507	0	0	6.59215	0	6.61755	0	0	20.4496	0	0	0	0	0
Zoo1_Sample4	9.54511	0	0	0	0	10.2648	0	6.54741	0	0	26.1966	0	0	30.2075	0	0	17.2385	0	0	0	0	0
Zoo1_Sample3	11.8135	5.5002	0	0	0	6.51255	0	17.9434	0	0	20.7174	8.1387	0	29.3743	0	0	0	0	0	0	0	0
Zoo1_Sample2	12.1183	0	15.4706	0	0	13.9089	0	7.67629	0	0	17.8165	6.68379	0	7.61383	0	0	18.7118	0	0	0	0	0
Zoo1_Sample1	19.0819	0	0	0	0	0	23.9558	0	0	0	7.7141	0	0	5.05557	0	0	12.8423	0	31.3503	0	0	0

## Sheet: Taxonomy_wildebeest
Sample	Other (<5%)	Euryarchaeota_Methanobacteriaceae	Actinobacteria_Micrococcaceae	Bacteroidetes_Bacteroidaceae	Bacteroidetes_unclassified	Bacteroidetes_Prevotellaceae	Bacteroidetes_Rikenellaceae	Firmicutes_unclassified	Firmicutes_Bacillaceae	Firmicutes_Planococcaceae	Firmicutes_Carnobacteriaceae	Firmicutes_Clostridiaceae	Firmicutes_Lachnospiraceae	Firmicutes_Oscillospiraceae	Firmicutes_Peptostreptococcaceae	Proteobacteria_Moraxellaceae	Spirochaetes_Spirochaetaceae	Verrucomicrobia_Akkermansiaceae
Zoo3_Sample14	21.0629	0	0	6.41607	7.90668	21.8082	14.0311	6.74012	0	0	0	0	0	11.6656	0	0	5.28192	5.08749
Zoo3_Sample13	34.0161	0	0	5.94837	12.7572	14.5716	13.6177	5.91096	0	0	0	0	5.34979	7.82828	0	0	0	0
Zoo3_Sample12	47.3896	23.3113	0	0	0	0	0	0	8.69611	0	0	8.04549	0	5.56996	6.98757	0	0	0
Zoo3_Sample11	47.7936	21.8996	9.39006	0	0	0	0	0	7.79863	0	0	5.31955	0	0	7.79863	0	0	0
Zoo3_Sample10	31.9059	14.7898	10.2866	0	0	0	0	0	7.82789	23.9523	0	5.04992	0	0	0	6.1876	0	0
Zoo3_Sample9	43.7288	18.6024	10.2639	0	0	0	0	0	0	18.4639	0	0	0	0	0	8.94106	0	0
Zoo3_Sample8	28.9954	18.602	10.7215	0	0	0	0	0	10.6465	17.1206	0	6.0616	0	0	0	7.85242	0	0
Zoo3_Sample7	50.5315	15.206	11.3152	0	0	7.10361	0	0	5.45907	10.3847	0	0	0	0	0	0	0	0
Zoo3_Sample6	49.7119	19.7631	8.18182	0	0	0	0	0	7.57362	14.7695	0	0	0	0	0	0	0	0
Zoo3_Sample5	39.6446	12.0859	22.2834	0	0	5.03374	0	0	0	20.9523	0	0	0	0	0	0	0	0
Zoo3_Sample4	35.5606	15.0665	14.9898	0	0	0	0	0	0	17.8704	0	0	0	0	5.47735	11.0352	0	0
Zoo3_Sample3	51.3134	17.062	13.5952	0	0	0	0	0	0	0	0	6.11767	0	0	0	11.9117	0	0
Zoo3_Sample2	40.4306	13.1524	6.98013	0	0	0	0	0	0	17.9431	7.63047	0	0	0	0	13.8633	0	0
Zoo3_Sample1	47.622	14.7802	9.14556	0	0	5.37137	0	0	0	17.151	0	5.92985	0	0	0	0	0	0
Zoo2_Sample1	41.8454	0	0	0	5.2778	15.1064	12.1443	0	0	9.06561	0	0	0	8.57194	0	0	0	7.98851
Zoo1_Sample28	37.5	9.5397	0	5.46318	0	14.9338	8.3084	0	0	0	0	0	7.68987	9.34407	7.22094	0	0	0
Zoo1_Sample27	50.4313	8.30534	0	0	0	9.0458	0	0	0	5.70229	0	0	7.49618	8.58779	10.4313	0	0	0
Zoo1_Sample26	40.3251	12.3285	0	5.34184	0	9.85742	9.65374	0	0	0	0	0	10.1649	12.3285	0	0	0	0
Zoo1_Sample25	32.1403	12.5535	0	0	0	19.0298	9.8516	0	0	0	0	0	8.17226	11.1277	7.12475	0	0	0
Zoo1_Sample24	44.8977	13.3577	0	0	5.41542	8.39213	0	0	5.44188	0	0	0	5.66678	7.88499	8.94338	0	0	0
Zoo1_Sample23	31.1408	20.2333	0	5.82659	0	10.8543	9.1553	0	0	0	0	0	6.14082	10.9981	5.65083	0	0	0
Zoo1_Sample22	32.9012	10.435	0	6.27812	0	16.306	7.61196	0	0	0	0	0	8.14228	10.601	7.72445	0	0	0
Zoo1_Sample21	32.6454	6.15157	0	6.29371	5.57166	9.27853	6.32782	0	0	0	0	0	5.60009	7.73211	11.0467	0	0	9.35244
Zoo1_Sample20	35.0002	9.90189	0	6.27119	0	13.085	10.4942	0	0	0	0	0	6.39327	10.449	8.4053	0	0	0
Zoo1_Sample19	29.5794	10.7246	0	6.22835	0	17.462	6.65253	0	0	0	0	0	6.48993	9.09155	13.7717	0	0	0
Zoo1_Sample18	43.5325	8.09658	0	6.33082	0	9.01423	0	0	0	0	0	0	6.81281	7.99462	12.7219	0	0	5.49659
Zoo1_Sample17	31.5084	11.1871	0	0	0	9.20617	6.18067	0	7.254	9.60236	0	0	5.82049	8.63708	10.6037	0	0	0
Zoo1_Sample16	31.2638	10.0316	0	5.53906	6.27917	8.86249	5.77476	0	0	0	0	0	6.86372	8.25909	10.8047	0	0	6.3216
Zoo1_Sample15	28.5988	7.22623	0	6.53103	0	10.3833	8.03623	0	0	0	0	0	8.93552	11.914	12.1755	0	0	6.19937
Zoo1_Sample14	32.8005	9.04856	0	6.47119	0	17.5757	7.16789	0	0	0	0	0	7.1337	10.1299	9.67259	0	0	0
Zoo1_Sample13	36.6417	0	0	7.16493	6.14885	16.1525	11.0564	5.11182	0	0	0	0	0	9.74179	0	0	0	7.98198
Zoo1_Sample12	41.8854	0	0	7.57934	6.46009	16.1014	11.5493	0	0	0	0	0	0	8.57089	0	0	0	7.85352
Zoo1_Sample11	37.6708	0	0	6.74784	6.01822	14.9131	11.2882	5.51166	0	0	0	0	0	10.8514	0	0	0	6.99879
Zoo1_Sample10	38.7024	0	0	6.23896	6.15909	15.0337	12.1001	5.82426	0	0	0	0	0	9.77621	0	0	0	6.16524
Zoo1_Sample9	31.8805	11.8315	0	0	0	16.7166	5.9112	0	0	0	0	0	7.0099	9.27994	9.85199	0	0	7.51839
Zoo1_Sample8	44.5809	7.64049	0	5.87249	0	12.6915	6.10273	0	0	0	0	0	6.70817	7.35056	9.05318	0	0	0
Zoo1_Sample7	40.3381	8.58453	0	6.51003	0	10.5673	9.81089	0	0	0	0	0	7.78223	10.894	0	0	5.51289	0
Zoo1_Sample6	29.7704	5.80562	0	5.51384	6.27333	12.5939	5.94722	0	0	0	0	0	5.73697	9.41858	8.04977	0	5.16627	5.72409
Zoo1_Sample5	30.1587	12.4202	0	0	0	21.8868	7.85469	0	0	0	0	0	7.65014	11.1438	8.88562	0	0	0
Zoo1_Sample4	40.2514	13.1714	0	0	0	10.7381	9.10238	0	0	0	0	0	9.52645	10.9022	6.30806	0	0	0
Zoo1_Sample3	41.8463	10.8985	0	0	0	14.5711	8.87743	0	0	0	0	0	5.62057	10.3403	7.8457	0	0	0
Zoo1_Sample2	42.8634	9.20174	0	0	0	13.293	6.41244	0	0	0	0	0	7.40235	10.9475	9.87955	0	0	0
Zoo1_Sample1	43.1286	9.14535	0	5.93524	0	11.0655	10.0609	0	0	0	0	0	10.2704	10.3941	0	0	0	0

## Sheet: Taxonomy_plains_zebra
Sample	Other (<5%)	Euryarchaeota_Methanobacteriaceae	Halobacterota_Methanosarcinaceae	Actinobacteriota_Micrococcaceae	Bacteroidetes_unclassified	Bacteroidetes_Paludibacteraceae	Bacteroidetes_Prevotellaceae	Bacteroidetes_Rikenellaceae	Fibrobacteres_Fibrobacteraceae	Firmicutes_Bacillaceae	Firmicutes_Planococcaceae	Firmicutes_Christensenellaceae	Firmicutes_Oscillospiraceae	Firmicutes_Lachnospiraceae	Firmicutes_Anaerovoracaceae	Firmicutes_Acidaminococcaceae	Proteobacteria_Moraxellaceae	Spirochaetes_Spirochaetaceae	Verrucomicrobiota_Akkermansiaceae
Zoo6_Sample3	24.4072	0	0	0	27.4727	0	10.3114	7.65169	0	0	7.74947	0	0	5.35863	0	0	0	17.0488	0
Zoo6_Sample2	25.719	0	0	0	25.1749	0	15.5465	7.72659	0	0	0	0	0	7.79914	0	0	0	18.0339	0
Zoo6_Sample1	29.9726	0	0	0	21.2262	0	13.3913	6.80441	0	0	0	0	0	10.1911	0	0	0	18.4144	0
Zoo5_Sample8	24.9533	0	0	0	20.9708	0	10.5414	7.2682	6.53391	0	0	0	0	10.9272	0	0	0	18.8052	0
Zoo5_Sample7	18.6099	0	0	0	19.8879	0	14.068	5.33818	7.39284	0	0	0	0	9.07393	0	0	0	25.6292	0
Zoo5_Sample6	34.9007	0	0	13.8952	0	0	0	0	0	19.3866	15.8802	0	5.75984	10.1774	0	0	0	0	0
Zoo5_Sample5	39.2115	0	0	11.8752	7.95055	0	5.42943	0	0	13.3844	0	0	7.82735	14.3215	0	0	0	0	0
Zoo5_Sample4	40.9198	0	0	13.9087	0	0	0	0	0	8.6668	6.1913	0	5.72172	7.93181	0	0	16.6599	0	0
Zoo5_Sample3	41.1898	10.7302	5.75162	15.7802	0	0	0	0	0	16.6289	0	0	0	9.91933	0	0	0	0	0
Zoo5_Sample2	43.5023	0	0	0	0	0	0	0	0	6.9381	9.58666	0	6.7466	15.7234	0	0	0	17.5029	0
Zoo5_Sample1	43.9761	0	0	0	0	0	0	6.87101	0	8.92734	0	0	6.92352	11.1025	0	0	0	9.76203	12.4375
Zoo4_Sample3	32.8581	0	0	0	21.6998	0	12.6936	8.47156	0	0	0	0	0	8.14256	0	0	0	16.1343	0
Zoo4_Sample2	32.2523	0	0	0	21.655	0	9.0702	8.54179	0	0	0	0	0	10.2773	0	0	0	18.2034	0
Zoo4_Sample1	21.6152	0	0	0	26.2945	0	9.1924	6.55582	9.69121	0	0	0	0	8.33729	0	0	0	18.3135	0
Zoo3_Sample6	28.7847	0	0	0	14.3208	7.2933	5.17347	8.51339	6.13455	0	0	0	0	7.42962	0	0	0	22.3502	0
Zoo3_Sample5	29.9357	5.24298	0	0	14.3365	0	10.3507	7.95467	0	0	0	0	0	12.7974	0	5.80674	0	13.5754	0
Zoo3_Sample4	35.3489	0	0	0	15.746	0	6.19864	8.7541	8.44535	0	0	0	0	7.29587	0	0	0	18.2112	0
Zoo3_Sample3	27.2776	0	0	0	19.7596	0	16.0848	8.27591	0	0	0	0	0	9.10274	0	0	0	19.4993	0
Zoo3_Sample2	27.0496	0	0	0	21.2869	0	14.5072	8.70056	0	0	0	0	0	10.0377	0	0	0	18.4181	0
Zoo3_Sample1	28.2495	0	0	0	18.0412	0	9.00231	12.3158	6.35278	0	0	0	0	7.97296	0	0	0	18.0655	0
Zoo2_Sample3	33.5132	0	0	0	22.6889	0	10.1374	6.97743	0	0	0	0	0	6.26104	0	0	0	20.422	0
Zoo2_Sample2	29.0739	0	0	0	21.7432	0	10.3658	9.71206	0	0	0	0	0	9.68093	0	0	0	19.4241	0
Zoo1_Sample15	35.6482	0	0	0	13.9062	0	7.75181	7.61729	0	0	0	0	0	12.2247	0	0	0	22.8519	0
Zoo1_Sample14	35.7911	0	0	0	15.8933	0	6.74613	12.3797	0	0	0	0	0	15.3881	0	0	0	13.8016	0
Zoo1_Sample13	34.4925	0	0	0	17.5698	0	8.63324	9.79579	0	0	0	0	0	7.98625	0	0	0	21.5224	0
Zoo1_Sample12	39.943	0	0	0	16.4575	0	9.06782	7.92857	0	0	0	0	0	17.8046	0	0	0	8.7984	0
Zoo1_Sample11	27.9764	0	0	0	17.3328	0	7.5305	7.32015	6.87842	0	0	0	0	12.3054	0	0	0	20.6563	0
Zoo1_Sample10	43.0812	0	0	0	8.5489	0	5.7896	5.61304	0	0	0	0	6.20432	16.6215	0	0	0	14.1414	0
Zoo1_Sample9	36.9151	0	0	0	13.3434	0	6.73477	14.3082	0	0	0	0	0	15.3739	0	0	0	13.3245	0
Zoo1_Sample8	44.1222	0	0	0	0	0	0	7.14799	0	0	0	0	7.16913	13.3026	5.97709	0	0	13.4463	8.83459
Zoo1_Sample7	56.2871	0	0	0	0	0	0	0	0	0	0	7.79637	8.84423	16.6276	0	0	0	10.4447	0
Zoo1_Sample6	33.3333	0	0	0	8.66803	0	6.03018	6.26844	0	0	0	0	5.33243	21.1255	0	0	0	19.2421	0
Zoo1_Sample5	38.4001	0	0	0	12.6597	0	6.75087	13.4579	0	0	0	0	5.56384	13.5836	0	0	0	9.58395	0
Zoo1_Sample4	35.2184	0	0	0	16.7325	0	8.14154	10.1339	0	0	0	0	0	11.2815	0	0	0	18.4922	0
Zoo1_Sample3	34.8061	0	0	0	14.1147	0	8.16189	8.1113	0	0	0	0	0	7.20067	0	0	0	27.6054	0
Zoo1_Sample2	37.0479	0	0	0	16.5011	0	6.51461	9.69717	0	0	0	0	0	13.2173	0	0	0	17.0219	0
Zoo1_Sample1	28.7654	0	0	0	13.1429	0	5.52878	10.5581	7.30746	0	0	0	0	14.9041	0	0	0	19.7932	0
