# Supplementary material for: Unraveling differences in fecal microbiota stability in mammals: from high variable carnivores and consistently stable herbivores
Source: Anim Microbiome. 2021 Nov 4;3:77. doi: 10.1186/s42523-021-00141-0 (PMC8567652; doi:10.1186/s42523-021-00141-0)
Supplement: Supplementary file 3 — Additional file 3. Randomized datasets on the most abundant bacterial families in selected herbivore and carnivore species. For each species (plains zebra, giraffe, wildebeest, brown bear, lion, tiger) random sample ID’s were chosen for n = 3, 6, 10, 15, 20 and 25 samples to calculate the coefficient of variation for the bacterial families. [file 42523_2021_141_MOESM3_ESM.xlsx]

## Sheet: zebra_random
n=3	Sample	Bacteroidetes_Prevotellaceae	Bacteroidetes_Rikenellaceae	Firmicutes_Oscillospiraceae	Firmicutes_Lachnospiraceae	Spirochaetes_Spirochaetaceae
	Zoo6_Sample3	10.3114	7.65169	5.35863	0	17.0488
	Zoo1_Sample5	6.75087	13.4579	13.5836	5.56384	9.58395
	Zoo1_Sample3	8.16189	8.1113	7.20067	6.07083	27.6054
	Mean	8.40807	9.74029	8.7143	3.87822	18.0794
	SD	1.79301	3.22772	4.31635	3.36819	9.05481
	CV	0.213249	0.331378	0.495318	0.868489	0.500836
	Zoo1_Sample1	5.52878	10.5581	14.9041	3.84649	19.7932
	Zoo2_Sample2	10.3658	9.71206	9.68093	2.94163	19.4241
	Zoo1_Sample9	6.73477	14.3082	15.3739	2.97011	13.3245
	Mean	7.5431	11.5261	13.3196	3.25274	17.5139
	SD	2.51776	2.44622	3.15996	0.514396	3.63286
	CV	0.333784	0.212232	0.237241	0.158142	0.207426
	Zoo5_Sample3	2.17209	3.98286	9.91933	2.26872	0
	Zoo2_Sample3	10.1374	6.97743	6.26104	3.5525	20.422
	Zoo5_Sample4	3.05737	3.74643	7.93181	5.72172	0
	Mean	5.12228	4.90224	8.03739	3.84765	6.80733
	SD	4.36571	1.80105	1.83143	1.74532	11.7906
	CV	0.852298	0.367394	0.227864	0.453607	1.73205
n=6	Zoo5_Sample6	0	2.45688	10.1774	3.15652	2.48129
	Zoo6_Sample3	10.3114	7.65169	5.35863	0	17.0488
	Zoo1_Sample5	6.75087	13.4579	13.5836	5.56384	9.58395
	Zoo1_Sample4	8.14154	10.1339	11.2815	4.54574	18.4922
	Zoo5_Sample2	4.9642	4.2483	15.7234	7.45956	17.5029
	Zoo1_Sample10	5.7896	5.61304	16.6215	10.6307	14.1414
	Mean	5.99294	7.26028	12.1243	5.22606	13.2084
	SD	3.48871	4.04176	4.13723	3.64336	6.16746
	CV	0.582136	0.556695	0.341234	0.697152	0.466934
	Zoo1_Sample10	5.7896	5.61304	16.6215	10.6307	14.1414
	Zoo1_Sample9	6.73477	14.3082	15.3739	2.97011	13.3245
	Zoo1_Sample4	8.14154	10.1339	11.2815	4.54574	18.4922
	Zoo5_Sample4	3.05737	3.74643	7.93181	5.72172	0
	Zoo2_Sample2	10.3658	9.71206	9.68093	2.94163	19.4241
	Zoo3_Sample3	16.0848	8.27591	9.10274	0	19.4993
	Mean	8.36231	8.63159	11.6654	4.46832	14.1469
	SD	4.49689	3.70814	3.54707	3.58031	7.43223
	CV	0.537756	0.429601	0.304068	0.801266	0.52536
	Zoo3_Sample3	16.0848	8.27591	9.10274	0	19.4993
	Zoo1_Sample9	6.73477	14.3082	15.3739	2.97011	13.3245
	Zoo5_Sample5	5.42943	3.99067	14.3215	7.14977	3.57269
	Zoo1_Sample6	6.03018	6.26844	21.1255	9.12185	19.2421
	Zoo3_Sample4	6.19864	8.7541	7.29587	3.22994	18.2112
	Zoo1_Sample1	5.52878	10.5581	14.9041	3.84649	19.7932
	Mean	7.66777	8.69258	13.6873	4.38636	15.6072
	SD	4.15073	3.55465	4.93807	3.2538	6.36718
	CV	0.541322	0.408929	0.360778	0.741799	0.407965
n= 10	Zoo5_Sample1	3.73124	6.87101	11.1025	6.92352	9.76203
	Zoo4_Sample1	9.1924	6.55582	8.33729	2.16152	18.3135
	Zoo2_Sample3	10.1374	6.97743	6.26104	3.5525	20.422
	Zoo1_Sample11	7.5305	7.32015	12.3054	4.75389	20.6563
	Zoo1_Sample1	5.52878	10.5581	14.9041	3.84649	19.7932
	Zoo3_Sample1	9.00231	12.3158	7.97296	2.10135	18.0655
	Zoo5_Sample2	4.9642	4.2483	15.7234	7.45956	17.5029
	Zoo3_Sample6	5.17347	8.51339	7.42962	2.76055	22.3502
	Zoo2_Sample3	10.1374	6.97743	6.26104	3.5525	20.422
	Zoo5_Sample1	3.73124	6.87101	11.1025	6.92352	9.76203
	Mean	6.91289	7.72084	10.14	4.40354	17.705
	SD	2.57601	2.25875	3.42859	2.02615	4.42387
	CV	0.372639	0.292553	0.338126	0.460119	0.249866
	Zoo5_Sample8	10.5414	7.2682	10.9272	2.15308	18.8052
	Zoo3_Sample3	16.0848	8.27591	9.10274	0	19.4993
	Zoo1_Sample13	8.63324	9.79579	7.98625	6.99555	21.5224
	Zoo5_Sample4	3.05737	3.74643	7.93181	5.72172	0
	Zoo1_Sample2	6.51461	9.69717	13.2173	7.44045	17.0219
	Zoo1_Sample3	8.16189	8.1113	7.20067	6.07083	27.6054
	Zoo5_Sample3	2.17209	3.98286	9.91933	2.26872	0
	Zoo1_Sample2	6.51461	9.69717	13.2173	7.44045	17.0219
	Zoo6_Sample2	15.5465	7.72659	7.79914	5.58636	18.0339
	Zoo5_Sample7	14.068	5.33818	9.07393	0	25.6292
	Mean	9.12945	7.36396	9.63756	4.36772	16.5139
	SD	4.89978	2.28411	2.18403	2.97157	9.39032
	CV	0.5367	0.310175	0.226616	0.680349	0.56863
	Zoo5_Sample1	3.73124	6.87101	11.1025	6.92352	9.76203
	Zoo5_Sample4	3.05737	3.74643	7.93181	5.72172	0
	Zoo5_Sample3	2.17209	3.98286	9.91933	2.26872	0
	Zoo3_Sample3	16.0848	8.27591	9.10274	0	19.4993
	Zoo1_Sample5	6.75087	13.4579	13.5836	5.56384	9.58395
	Zoo4_Sample2	9.0702	8.54179	10.2773	3.44192	18.2034
	Zoo2_Sample2	10.3658	9.71206	9.68093	2.94163	19.4241
	Zoo5_Sample7	14.068	5.33818	9.07393	0	25.6292
	Zoo5_Sample6	0	2.45688	10.1774	3.15652	2.48129
	Zoo1_Sample7	3.24002	4.00636	16.6276	5.66416	10.4447
	Mean	6.85404	6.63894	10.7477	3.5682	11.5028
	SD	5.38134	3.39657	2.55057	2.40375	8.97523
	CV	0.785134	0.511613	0.237313	0.673659	0.780265
n= 15	Zoo1_Sample10	5.7896	5.61304	16.6215	10.6307	14.1414
	Zoo1_Sample13	8.63324	9.79579	7.98625	6.99555	21.5224
	Zoo1_Sample11	7.5305	7.32015	12.3054	4.75389	20.6563
	Zoo5_Sample1	3.73124	6.87101	11.1025	6.92352	9.76203
	Zoo1_Sample5	6.75087	13.4579	13.5836	5.56384	9.58395
	Zoo6_Sample3	10.3114	7.65169	5.35863	0	17.0488
	Zoo2_Sample2	10.3658	9.71206	9.68093	2.94163	19.4241
	Zoo1_Sample14	6.74613	12.3797	15.3881	3.62424	13.8016
	Zoo2_Sample3	10.1374	6.97743	6.26104	3.5525	20.422
	Zoo5_Sample5	5.42943	3.99067	14.3215	7.14977	3.57269
	Zoo1_Sample6	6.03018	6.26844	21.1255	9.12185	19.2421
	Zoo6_Sample1	13.3913	6.80441	10.1911	5.73248	18.4144
	Zoo1_Sample3	8.16189	8.1113	7.20067	6.07083	27.6054
	Zoo3_Sample3	16.0848	8.27591	9.10274	0	19.4993
	Zoo5_Sample6	0	2.45688	10.1774	3.15652	2.48129
	Mean	7.93959	7.71243	11.3605	5.08116	15.8119
	SD	3.88459	2.85112	4.27055	2.9831	6.93261
	CV	0.489268	0.369679	0.375914	0.58709	0.438444
	Zoo1_Sample8	0	7.14799	13.3026	7.16913	13.4463
	Zoo1_Sample10	5.7896	5.61304	16.6215	10.6307	14.1414
	Zoo5_Sample3	2.17209	3.98286	9.91933	2.26872	0
	Zoo1_Sample6	6.03018	6.26844	21.1255	9.12185	19.2421
	Zoo5_Sample7	14.068	5.33818	9.07393	0	25.6292
	Zoo5_Sample4	3.05737	3.74643	7.93181	5.72172	0
	Zoo5_Sample5	5.42943	3.99067	14.3215	7.14977	3.57269
	Zoo3_Sample2	14.5072	8.70056	10.0377	2.18456	18.4181
	Zoo1_Sample12	9.06782	7.92857	17.8046	3.62559	8.7984
	Zoo4_Sample1	9.1924	6.55582	8.33729	2.16152	18.3135
	Zoo3_Sample3	16.0848	8.27591	9.10274	0	19.4993
	Zoo1_Sample3	8.16189	8.1113	7.20067	6.07083	27.6054
	Zoo6_Sample2	15.5465	7.72659	7.79914	5.58636	18.0339
	Zoo4_Sample2	9.0702	8.54179	10.2773	3.44192	18.2034
	Zoo1_Sample7	3.24002	4.00636	16.6276	5.66416	10.4447
	Mean	8.0945	6.39563	11.9655	4.71979	14.3566
	SD	5.10954	1.83595	4.35529	3.12885	8.40484
	CV	0.631236	0.287062	0.363986	0.662922	0.585435
	Zoo3_Sample6	5.17347	8.51339	7.42962	2.76055	22.3502
	Zoo6_Sample2	15.5465	7.72659	7.79914	5.58636	18.0339
	Zoo3_Sample3	16.0848	8.27591	9.10274	0	19.4993
	Zoo1_Sample1	5.52878	10.5581	14.9041	3.84649	19.7932
	Zoo1_Sample2	6.51461	9.69717	13.2173	7.44045	17.0219
	Zoo2_Sample3	10.1374	6.97743	6.26104	3.5525	20.422
	Zoo1_Sample9	6.73477	14.3082	15.3739	2.97011	13.3245
	Zoo3_Sample2	14.5072	8.70056	10.0377	2.18456	18.4181
	Zoo3_Sample4	6.19864	8.7541	7.29587	3.22994	18.2112
	Zoo5_Sample8	10.5414	7.2682	10.9272	2.15308	18.8052
	Zoo4_Sample2	9.0702	8.54179	10.2773	3.44192	18.2034
	Zoo1_Sample5	6.75087	13.4579	13.5836	5.56384	9.58395
	Zoo3_Sample1	9.00231	12.3158	7.97296	2.10135	18.0655
	Zoo1_Sample13	8.63324	9.79579	7.98625	6.99555	21.5224
	Zoo1_Sample7	3.24002	4.00636	16.6276	5.66416	10.4447
	Mean	8.91095	9.25982	10.5864	3.83272	17.58
	SD	3.88361	2.62336	3.35451	2.03819	3.69999
	CV	0.435825	0.283305	0.316869	0.531785	0.210466
n=20	Zoo4_Sample1	9.1924	6.55582	8.33729	2.16152	18.3135
	Zoo6_Sample2	15.5465	7.72659	7.79914	5.58636	18.0339
	Zoo2_Sample3	10.1374	6.97743	6.26104	3.5525	20.422
	Zoo1_Sample2	6.51461	9.69717	13.2173	7.44045	17.0219
	Zoo5_Sample5	5.42943	3.99067	14.3215	7.14977	3.57269
	Zoo1_Sample10	5.7896	5.61304	16.6215	10.6307	14.1414
	Zoo5_Sample7	14.068	5.33818	9.07393	0	25.6292
	Zoo1_Sample5	6.75087	13.4579	13.5836	5.56384	9.58395
	Zoo1_Sample14	6.74613	12.3797	15.3881	3.62424	13.8016
	Zoo5_Sample8	10.5414	7.2682	10.9272	2.15308	18.8052
	Zoo1_Sample7	3.24002	4.00636	16.6276	5.66416	10.4447
	Zoo3_Sample4	6.19864	8.7541	7.29587	3.22994	18.2112
	Zoo1_Sample1	5.52878	10.5581	14.9041	3.84649	19.7932
	Zoo5_Sample2	4.9642	4.2483	15.7234	7.45956	17.5029
	Zoo6_Sample1	13.3913	6.80441	10.1911	5.73248	18.4144
	Zoo3_Sample5	10.3507	7.95467	12.7974	3.04431	13.5754
	Zoo3_Sample1	9.00231	12.3158	7.97296	2.10135	18.0655
	Zoo5_Sample1	3.73124	6.87101	11.1025	6.92352	9.76203
	Zoo1_Sample9	6.73477	14.3082	15.3739	2.97011	13.3245
	Zoo1_Sample6	6.03018	6.26844	21.1255	9.12185	19.2421
	Mean	7.99442	8.05471	12.4322	4.89781	15.8831
	SD	3.43033	3.12588	3.93112	2.67948	4.9164
	CV	0.42909	0.388081	0.316203	0.547077	0.309538
	Zoo1_Sample5	6.75087	13.4579	13.5836	5.56384	9.58395
	Zoo2_Sample3	10.1374	6.97743	6.26104	3.5525	20.422
	Zoo5_Sample3	2.17209	3.98286	9.91933	2.26872	0
	Zoo5_Sample5	5.42943	3.99067	14.3215	7.14977	3.57269
	Zoo1_Sample13	8.63324	9.79579	7.98625	6.99555	21.5224
	Zoo3_Sample1	9.00231	12.3158	7.97296	2.10135	18.0655
	Zoo5_Sample3	2.17209	3.98286	9.91933	2.26872	0
	Zoo3_Sample3	16.0848	8.27591	9.10274	0	19.4993
	Zoo1_Sample10	5.7896	5.61304	16.6215	10.6307	14.1414
	Zoo4_Sample2	9.0702	8.54179	10.2773	3.44192	18.2034
	Zoo4_Sample2	9.0702	8.54179	10.2773	3.44192	18.2034
	Zoo1_Sample9	6.73477	14.3082	15.3739	2.97011	13.3245
	Zoo5_Sample7	14.068	5.33818	9.07393	0	25.6292
	Zoo5_Sample4	3.05737	3.74643	7.93181	5.72172	0
	Zoo1_Sample14	6.74613	12.3797	15.3881	3.62424	13.8016
	Zoo3_Sample6	5.17347	8.51339	7.42962	2.76055	22.3502
	Zoo5_Sample6	0	2.45688	10.1774	3.15652	2.48129
	Zoo5_Sample1	3.73124	6.87101	11.1025	6.92352	9.76203
	Zoo6_Sample1	13.3913	6.80441	10.1911	5.73248	18.4144
	Zoo5_Sample8	10.5414	7.2682	10.9272	2.15308	18.8052
	Mean	7.3878	7.65811	10.6919	4.02286	13.3891
	SD	4.21324	3.42929	2.90824	2.60659	8.23152
	CV	0.570297	0.447798	0.272003	0.647944	0.614792
	Zoo5_Sample2	4.9642	4.2483	15.7234	7.45956	17.5029
	Zoo1_Sample8	0	7.14799	13.3026	7.16913	13.4463
	Zoo1_Sample12	9.06782	7.92857	17.8046	3.62559	8.7984
	Zoo1_Sample5	6.75087	13.4579	13.5836	5.56384	9.58395
	Zoo3_Sample5	10.3507	7.95467	12.7974	3.04431	13.5754
	Zoo6_Sample3	10.3114	7.65169	5.35863	0	17.0488
	Zoo1_Sample14	6.74613	12.3797	15.3881	3.62424	13.8016
	Zoo3_Sample6	5.17347	8.51339	7.42962	2.76055	22.3502
	Zoo1_Sample1	5.52878	10.5581	14.9041	3.84649	19.7932
	Zoo5_Sample8	10.5414	7.2682	10.9272	2.15308	18.8052
	Zoo1_Sample4	8.14154	10.1339	11.2815	4.54574	18.4922
	Zoo1_Sample9	6.73477	14.3082	15.3739	2.97011	13.3245
	Zoo1_Sample1	5.52878	10.5581	14.9041	3.84649	19.7932
	Zoo1_Sample3	8.16189	8.1113	7.20067	6.07083	27.6054
	Zoo5_Sample7	14.068	5.33818	9.07393	0	25.6292
	Zoo6_Sample1	13.3913	6.80441	10.1911	5.73248	18.4144
	Zoo1_Sample2	6.51461	9.69717	13.2173	7.44045	17.0219
	Zoo1_Sample7	3.24002	4.00636	16.6276	5.66416	10.4447
	Zoo5_Sample1	3.73124	6.87101	11.1025	6.92352	9.76203
	Zoo1_Sample15	7.75181	7.61729	12.2247	4.82596	22.8519
	Mean	7.33494	8.52773	12.4208	4.36333	16.9023
	SD	3.37838	2.76579	3.35504	2.20633	5.32462
	CV	0.460587	0.324329	0.270114	0.505654	0.315024
n=25	Zoo1_Sample1	5.52878	10.5581	14.9041	3.84649	19.7932
	Zoo1_Sample10	5.7896	5.61304	16.6215	10.6307	14.1414
	Zoo1_Sample12	9.06782	7.92857	17.8046	3.62559	8.7984
	Zoo1_Sample14	6.74613	12.3797	15.3881	3.62424	13.8016
	Zoo1_Sample15	7.75181	7.61729	12.2247	4.82596	22.8519
	Zoo2_Sample2	10.3658	9.71206	9.68093	2.94163	19.4241
	Zoo1_Sample3	8.16189	8.1113	7.20067	6.07083	27.6054
	Zoo1_Sample4	8.14154	10.1339	11.2815	4.54574	18.4922
	Zoo1_Sample5	6.75087	13.4579	13.5836	5.56384	9.58395
	Zoo1_Sample7	3.24002	4.00636	16.6276	5.66416	10.4447
	Zoo1_Sample9	6.73477	14.3082	15.3739	2.97011	13.3245
	Zoo3_Sample1	9.00231	12.3158	7.97296	2.10135	18.0655
	Zoo3_Sample2	14.5072	8.70056	10.0377	2.18456	18.4181
	Zoo3_Sample3	16.0848	8.27591	9.10274	0	19.4993
	Zoo3_Sample5	10.3507	7.95467	12.7974	3.04431	13.5754
	Zoo4_Sample1	9.1924	6.55582	8.33729	2.16152	18.3135
	Zoo4_Sample2	9.0702	8.54179	10.2773	3.44192	18.2034
	Zoo4_Sample3	12.6936	8.47156	8.14256	3.05689	16.1343
	Zoo6_Sample2	15.5465	7.72659	7.79914	5.58636	18.0339
	Zoo5_Sample1	3.73124	6.87101	11.1025	6.92352	9.76203
	Zoo5_Sample2	4.9642	4.2483	15.7234	7.45956	17.5029
	Zoo5_Sample5	5.42943	3.99067	14.3215	7.14977	3.57269
	Zoo5_Sample7	14.068	5.33818	9.07393	0	25.6292
	Zoo6_Sample1	13.3913	6.80441	10.1911	5.73248	18.4144
	Zoo6_Sample3	10.3114	7.65169	5.35863	0	17.0488
	Mean	9.06489	8.29094	11.6372	4.12606	16.4174
	SD	3.63971	2.77203	3.47591	2.52395	5.34944
	CV	0.401517	0.334344	0.29869	0.611709	0.32584
	Zoo5_Sample5	5.42943	3.99067	14.3215	7.14977	3.57269
	Zoo5_Sample2	4.9642	4.2483	15.7234	7.45956	17.5029
	Zoo1_Sample12	9.06782	7.92857	17.8046	3.62559	8.7984
	Zoo5_Sample7	14.068	5.33818	9.07393	0	25.6292
	Zoo1_Sample4	8.14154	10.1339	11.2815	4.54574	18.4922
	Zoo3_Sample5	10.3507	7.95467	12.7974	3.04431	13.5754
	Zoo5_Sample8	10.5414	7.2682	10.9272	2.15308	18.8052
	Zoo6_Sample3	10.3114	7.65169	5.35863	0	17.0488
	Zoo3_Sample2	14.5072	8.70056	10.0377	2.18456	18.4181
	Zoo3_Sample4	6.19864	8.7541	7.29587	3.22994	18.2112
	Zoo2_Sample3	10.1374	6.97743	6.26104	3.5525	20.422
	Zoo2_Sample2	10.3658	9.71206	9.68093	2.94163	19.4241
	Zoo3_Sample1	9.00231	12.3158	7.97296	2.10135	18.0655
	Zoo4_Sample3	12.6936	8.47156	8.14256	3.05689	16.1343
	Zoo6_Sample1	13.3913	6.80441	10.1911	5.73248	18.4144
	Zoo1_Sample1	5.52878	10.5581	14.9041	3.84649	19.7932
	Zoo5_Sample1	3.73124	6.87101	11.1025	6.92352	9.76203
	Zoo3_Sample6	5.17347	8.51339	7.42962	2.76055	22.3502
	Zoo1_Sample14	6.74613	12.3797	15.3881	3.62424	13.8016
	Zoo5_Sample3	2.17209	3.98286	9.91933	2.26872	0
	Zoo1_Sample8	0	7.14799	13.3026	7.16913	13.4463
	Zoo1_Sample2	6.51461	9.69717	13.2173	7.44045	17.0219
	Zoo6_Sample2	15.5465	7.72659	7.79914	5.58636	18.0339
	Zoo1_Sample15	7.75181	7.61729	12.2247	4.82596	22.8519
	Zoo1_Sample9	6.73477	14.3082	15.3739	2.97011	13.3245
	Mean	8.36281	8.2021	11.1013	3.92772	16.116
	SD	3.91775	2.53121	3.3203	2.14681	5.75326
	CV	0.468473	0.308605	0.299092	0.54658	0.356991
	Zoo6_Sample3	10.3114	7.65169	5.35863	0	17.0488
	Zoo6_Sample2	15.5465	7.72659	7.79914	5.58636	18.0339
	Zoo5_Sample8	10.5414	7.2682	10.9272	2.15308	18.8052
	Zoo5_Sample7	14.068	5.33818	9.07393	0	25.6292
	Zoo5_Sample6	0	2.45688	10.1774	3.15652	2.48129
	Zoo5_Sample4	3.05737	3.74643	7.93181	5.72172	0
	Zoo5_Sample3	2.17209	3.98286	9.91933	2.26872	0
	Zoo5_Sample1	3.73124	6.87101	11.1025	6.92352	9.76203
	Zoo4_Sample3	12.6936	8.47156	8.14256	3.05689	16.1343
	Zoo4_Sample2	9.0702	8.54179	10.2773	3.44192	18.2034
	Zoo3_Sample5	10.3507	7.95467	12.7974	3.04431	13.5754
	Zoo3_Sample4	6.19864	8.7541	7.29587	3.22994	18.2112
	Zoo3_Sample2	14.5072	8.70056	10.0377	2.18456	18.4181
	Zoo3_Sample1	9.00231	12.3158	7.97296	2.10135	18.0655
	Zoo2_Sample2	10.3658	9.71206	9.68093	2.94163	19.4241
	Zoo1_Sample15	7.75181	7.61729	12.2247	4.82596	22.8519
	Zoo1_Sample13	8.63324	9.79579	7.98625	6.99555	21.5224
	Zoo1_Sample12	9.06782	7.92857	17.8046	3.62559	8.7984
	Zoo1_Sample11	7.5305	7.32015	12.3054	4.75389	20.6563
	Zoo1_Sample10	5.7896	5.61304	16.6215	10.6307	14.1414
	Zoo1_Sample8	0	7.14799	13.3026	7.16913	13.4463
	Zoo1_Sample7	3.24002	4.00636	16.6276	5.66416	10.4447
	Zoo1_Sample6	6.03018	6.26844	21.1255	9.12185	19.2421
	Zoo1_Sample4	8.14154	10.1339	11.2815	4.54574	18.4922
	Zoo1_Sample2	6.51461	9.69717	13.2173	7.44045	17.0219
	Mean	7.77263	7.40084	11.2397	4.42334	15.2164
	SD	4.20941	2.28082	3.69555	2.62128	6.68087
	CV	0.541569	0.308183	0.328795	0.592601	0.439057

## Sheet: wildebeest_random
n=3	Sample	Bacteroidetes_Prevotellaceae	Bacteroidetes_Rikenellaceae	Firmicutes_Lachnospiraceae	Firmicutes_Oscillospiraceae	Spirochaetes_Spirochaetaceae
	Zoo3_Sample4	0	0	0	0	0
	Zoo1_Sample2	13.293	6.41244	7.40235	10.9475	0
	Zoo1_Sample18	9.01423	0	6.81281	7.99462	0
	Mean	7.43575	2.13748	4.73839	6.31404	0
	SD	6.78563	3.70223	4.11414	5.66393	0
	CV	0.912569	1.73205	0.868257	0.897038	#DIV/0!
	Zoo1_Sample21	9.27853	6.32782	5.60009	7.73211	0
	Zoo3_Sample4	0	0	0	0	0
	Zoo3_Sample3	0	0	0	0	0
	Mean	3.09284	2.10927	1.8667	2.57737	0
	SD	5.35696	3.65337	3.23321	4.46413	0
	CV	1.73205	1.73205	1.73205	1.73205	#DIV/0!
	Zoo1_Sample5	21.8868	7.85469	7.65014	11.1438	0
	Zoo3_Sample2	0	0	0	0	0
	Zoo1_Sample22	16.306	7.61196	8.14228	10.601	0
	Mean	12.7309	5.15555	5.26414	7.24829	0
	SD	11.3729	4.46648	4.56551	6.28307	0
	CV	0.893331	0.866345	0.867286	0.866835	#DIV/0!
n=6	Zoo1_Sample25	19.0298	9.8516	8.17226	11.1277	0
	Zoo3_Sample1	5.37137	0	0	0	0
	Zoo1_Sample5	21.8868	7.85469	7.65014	11.1438	0
	Zoo1_Sample5	21.8868	7.85469	7.65014	11.1438	0
	Zoo1_Sample22	16.306	7.61196	8.14228	10.601	0
	Zoo1_Sample20	13.085	10.4942	6.39327	10.449	0
	Mean	16.2609	7.27785	6.33468	9.07757	0
	SD	6.31883	3.76067	3.16975	4.45749	0
	CV	0.388589	0.516728	0.50038	0.491044	#DIV/0!
	Zoo3_Sample9	0	0	0	0	0
	Zoo1_Sample27	9.0458	0	7.49618	8.58779	0
	Zoo3_Sample3	0	0	0	0	0
	Zoo3_Sample11	0	0	0	0	0
	Zoo1_Sample17	9.20617	6.18067	5.82049	8.63708	0
	Zoo3_Sample8	0	0	0	0	0
	Mean	3.04199	1.03011	2.21945	2.87081	0
	SD	4.71291	2.52325	3.47894	4.44747	0
	CV	1.54928	2.44949	1.56748	1.5492	#DIV/0!
	Zoo1_Sample24	8.39213	0	5.66678	7.88499	0
	Zoo1_Sample12	16.1014	11.5493	0	8.57089	0
	Zoo1_Sample2	13.293	6.41244	7.40235	10.9475	0
	Zoo3_Sample3	0	0	0	0	0
	Zoo1_Sample9	16.7166	5.9112	7.0099	9.27994	0
	Zoo3_Sample10	0	0	0	0	0
	Mean	9.08386	3.97882	3.34651	6.11388	0
	SD	7.6254	4.78459	3.71083	4.84397	0
	CV	0.839444	1.20252	1.10887	0.792291	#DIV/0!
n= 10	Zoo1_Sample22	16.306	7.61196	8.14228	10.601	0
	Zoo3_Sample11	0	0	0	0	0
	Zoo1_Sample17	9.20617	6.18067	5.82049	8.63708	0
	Zoo1_Sample18	9.01423	0	6.81281	7.99462	0
	Zoo3_Sample13	14.5716	13.6177	5.34979	7.82828	0
	Zoo1_Sample9	16.7166	5.9112	7.0099	9.27994	0
	Zoo1_Sample4	10.7381	9.10238	9.52645	10.9022	0
	Zoo1_Sample3	14.5711	8.87743	5.62057	10.3403	0
	Zoo3_Sample2	0	0	0	0	0
	Zoo2_Sample1	15.1064	12.1443	0	8.57194	0
	Mean	10.623	6.34456	4.82823	7.41554	0
	SD	6.24512	4.97926	3.55237	4.05037	0
	CV	0.587885	0.784808	0.735751	0.546201	#DIV/0!
	Zoo1_Sample13	16.1525	11.0564	0	9.74179	0
	Zoo1_Sample23	10.8543	9.1553	6.14082	10.9981	0
	Zoo3_Sample11	0	0	0	0	0
	Zoo3_Sample5	5.03374	0	0	0	0
	Zoo3_Sample10	0	0	0	0	0
	Zoo3_Sample8	0	0	0	0	0
	Zoo3_Sample2	0	0	0	0	0
	Zoo1_Sample28	14.9338	8.3084	7.68987	9.34407	0
	Zoo3_Sample14	21.8082	14.0311	0	11.6656	5.28192
	Zoo1_Sample9	16.7166	5.9112	7.0099	9.27994	0
	Mean	8.54991	4.84624	2.08406	5.10295	0.528192
	SD	8.5056	5.49795	3.37556	5.42601	1.67029
	CV	0.994817	1.13448	1.6197	1.06331	3.16228
	Zoo3_Sample4	0	0	0	0	0
	Zoo1_Sample21	9.27853	6.32782	5.60009	7.73211	0
	Zoo1_Sample9	16.7166	5.9112	7.0099	9.27994	0
	Zoo1_Sample15	10.3833	8.03623	8.93552	11.914	0
	Zoo1_Sample22	16.306	7.61196	8.14228	10.601	0
	Zoo1_Sample7	10.5673	9.81089	7.78223	10.894	5.51289
	Zoo3_Sample11	0	0	0	0	0
	Zoo1_Sample20	13.085	10.4942	6.39327	10.449	0
	Zoo3_Sample13	14.5716	13.6177	5.34979	7.82828	0
	Zoo1_Sample24	8.39213	0	5.66678	7.88499	0
	Mean	9.93005	6.18099	5.48799	7.65833	0.551289
	SD	5.95185	4.79909	3.12036	4.2823	1.74333
	CV	0.599378	0.776428	0.56858	0.559169	3.16228
n=15	Zoo1_Sample16	8.86249	5.77476	6.86372	8.25909	0
	Zoo1_Sample21	9.27853	6.32782	5.60009	7.73211	0
	Zoo1_Sample28	14.9338	8.3084	7.68987	9.34407	0
	Zoo1_Sample6	12.5939	5.94722	5.73697	9.41858	5.16627
	Zoo1_Sample8	12.6915	6.10273	6.70817	7.35056	0
	Zoo1_Sample9	16.7166	5.9112	7.0099	9.27994	0
	Zoo2_Sample1	15.1064	12.1443	0	8.57194	0
	Zoo3_Sample1	5.37137	0	0	0	0
	Zoo3_Sample10	0	0	0	0	0
	Zoo3_Sample11	0	0	0	0	0
	Zoo3_Sample12	0	0	0	5.56996	0
	Zoo3_Sample14	21.8082	14.0311	0	11.6656	5.28192
	Zoo3_Sample2	0	0	0	0	0
	Zoo3_Sample3	0	0	0	0	0
	Zoo3_Sample8	0	0	0	0	0
	Mean	7.82418	4.30317	2.64058	5.14612	0.696546
	SD	7.56478	4.75523	3.38132	4.53177	1.83831
	CV	0.966845	1.10505	1.28052	0.880619	2.63918
	Zoo3_Sample1	5.37137	0	0	0	0
	Zoo3_Sample2	0	0	0	0	0
	Zoo1_Sample22	16.306	7.61196	8.14228	10.601	0
	Zoo1_Sample28	14.9338	8.3084	7.68987	9.34407	0
	Zoo1_Sample21	9.27853	6.32782	5.60009	7.73211	0
	Zoo3_Sample6	0	0	0	0	0
	Zoo1_Sample9	16.7166	5.9112	7.0099	9.27994	0
	Zoo1_Sample6	12.5939	5.94722	5.73697	9.41858	5.16627
	Zoo1_Sample4	10.7381	9.10238	9.52645	10.9022	0
	Zoo1_Sample26	9.85742	9.65374	10.1649	12.3285	0
	Zoo1_Sample18	9.01423	0	6.81281	7.99462	0
	Zoo2_Sample1	15.1064	12.1443	0	8.57194	0
	Zoo1_Sample8	12.6915	6.10273	6.70817	7.35056	0
	Zoo1_Sample15	10.3833	8.03623	8.93552	11.914	0
	Zoo3_Sample13	14.5716	13.6177	5.34979	7.82828	0
	Mean	10.5042	6.18424	5.44511	7.55106	0.344418
	SD	5.27788	4.42758	3.66508	4.17926	1.33393
	CV	0.502455	0.715946	0.673096	0.553468	3.87298
	Zoo3_Sample14	21.8082	14.0311	0	11.6656	5.28192
	Zoo1_Sample10	15.0337	12.1001	0	9.77621	0
	Zoo1_Sample19	17.462	6.65253	6.48993	9.09155	0
	Zoo1_Sample18	9.01423	0	6.81281	7.99462	0
	Zoo1_Sample27	9.0458	0	7.49618	8.58779	0
	Zoo3_Sample9	0	0	0	0	0
	Zoo3_Sample2	0	0	0	0	0
	Zoo1_Sample4	10.7381	9.10238	9.52645	10.9022	0
	Zoo3_Sample12	0	0	0	5.56996	0
	Zoo3_Sample5	5.03374	0	0	0	0
	Zoo3_Sample1	5.37137	0	0	0	0
	Zoo2_Sample1	15.1064	12.1443	0	8.57194	0
	Zoo1_Sample6	12.5939	5.94722	5.73697	9.41858	5.16627
	Zoo3_Sample10	0	0	0	0	0
	Zoo1_Sample2	13.293	6.41244	7.40235	10.9475	0
	Mean	8.96669	4.42601	2.89765	6.16839	0.696546
	SD	7.05387	5.34873	3.75349	4.72955	1.83831
	CV	0.786675	1.20848	1.29536	0.76674	2.63918
n=20	Zoo1_Sample11	14.9131	11.2882	0	10.8514	0
	Zoo1_Sample14	17.5757	7.16789	7.1337	10.1299	0
	Zoo1_Sample15	10.3833	8.03623	8.93552	11.914	0
	Zoo1_Sample16	8.86249	5.77476	6.86372	8.25909	0
	Zoo1_Sample17	9.20617	6.18067	5.82049	8.63708	0
	Zoo1_Sample18	9.01423	0	6.81281	7.99462	0
	Zoo1_Sample2	13.293	6.41244	7.40235	10.9475	0
	Zoo1_Sample20	13.085	10.4942	6.39327	10.449	0
	Zoo1_Sample21	9.27853	6.32782	5.60009	7.73211	0
	Zoo1_Sample24	8.39213	0	5.66678	7.88499	0
	Zoo1_Sample28	14.9338	8.3084	7.68987	9.34407	0
	Zoo1_Sample4	10.7381	9.10238	9.52645	10.9022	0
	Zoo1_Sample6	12.5939	5.94722	5.73697	9.41858	5.16627
	Zoo1_Sample7	10.5673	9.81089	7.78223	10.894	5.51289
	Zoo3_Sample1	5.37137	0	0	0	0
	Zoo3_Sample2	0	0	0	0	0
	Zoo3_Sample3	0	0	0	0	0
	Zoo3_Sample5	5.03374	0	0	0	0
	Zoo3_Sample8	0	0	0	0	0
	Zoo3_Sample9	0	0	0	0	0
	Mean	8.66209	4.74256	4.56821	6.76792	0.533958
	SD	5.38157	4.22953	3.57823	4.68753	1.64445
	CV	0.621278	0.891826	0.783288	0.69261	3.07974
	Zoo1_Sample10	15.0337	12.1001	0	9.77621	0
	Zoo1_Sample12	16.1014	11.5493	0	8.57089	0
	Zoo1_Sample14	17.5757	7.16789	7.1337	10.1299	0
	Zoo1_Sample17	9.20617	6.18067	5.82049	8.63708	0
	Zoo1_Sample2	13.293	6.41244	7.40235	10.9475	0
	Zoo1_Sample21	9.27853	6.32782	5.60009	7.73211	0
	Zoo1_Sample23	10.8543	9.1553	6.14082	10.9981	0
	Zoo1_Sample25	19.0298	9.8516	8.17226	11.1277	0
	Zoo1_Sample28	14.9338	8.3084	7.68987	9.34407	0
	Zoo1_Sample4	10.7381	9.10238	9.52645	10.9022	0
	Zoo1_Sample5	21.8868	7.85469	7.65014	11.1438	0
	Zoo1_Sample7	10.5673	9.81089	7.78223	10.894	5.51289
	Zoo1_Sample8	12.6915	6.10273	6.70817	7.35056	0
	Zoo3_Sample13	14.5716	13.6177	5.34979	7.82828	0
	Zoo3_Sample14	21.8082	14.0311	0	11.6656	5.28192
	Zoo3_Sample2	0	0	0	0	0
	Zoo3_Sample4	0	0	0	0	0
	Zoo3_Sample5	5.03374	0	0	0	0
	Zoo3_Sample8	0	0	0	0	0
	Zoo3_Sample12	0	0	0	5.56996	0
	Mean	11.1302	6.87865	4.24882	7.6309	0.539741
	SD	7.06145	4.67065	3.67756	4.2147	1.66171
	CV	0.634441	0.679007	0.86555	0.55232	3.07872
	Zoo3_Sample14	21.8082	14.0311	0	11.6656	5.28192
	Zoo3_Sample11	0	0	0	0	0
	Zoo3_Sample9	0	0	0	0	0
	Zoo3_Sample8	0	0	0	0	0
	Zoo3_Sample6	0	0	0	0	0
	Zoo3_Sample3	0	0	0	0	0
	Zoo2_Sample1	15.1064	12.1443	0	8.57194	0
	Zoo1_Sample28	14.9338	8.3084	7.68987	9.34407	0
	Zoo1_Sample25	19.0298	9.8516	8.17226	11.1277	0
	Zoo1_Sample23	10.8543	9.1553	6.14082	10.9981	0
	Zoo1_Sample21	9.27853	6.32782	5.60009	7.73211	0
	Zoo1_Sample19	17.462	6.65253	6.48993	9.09155	0
	Zoo1_Sample17	9.20617	6.18067	5.82049	8.63708	0
	Zoo1_Sample16	8.86249	5.77476	6.86372	8.25909	0
	Zoo1_Sample13	16.1525	11.0564	0	9.74179	0
	Zoo1_Sample11	14.9131	11.2882	0	10.8514	0
	Zoo1_Sample10	15.0337	12.1001	0	9.77621	0
	Zoo1_Sample9	16.7166	5.9112	7.0099	9.27994	0
	Zoo1_Sample7	10.5673	9.81089	7.78223	10.894	5.51289
	Zoo1_Sample4	10.7381	9.10238	9.52645	10.9022	0
	Mean	10.5331	6.88479	3.55479	7.34364	0.539741
	SD	7.10029	4.65793	3.74041	4.47341	1.66171
	CV	0.67409	0.676554	1.05222	0.609155	3.07872
n=25	Zoo1_Sample1	11.0655	10.0609	10.2704	10.3941	0
	Zoo1_Sample1	11.0655	10.0609	10.2704	10.3941	0
	Zoo1_Sample10	15.0337	12.1001	0	9.77621	0
	Zoo1_Sample13	16.1525	11.0564	0	9.74179	0
	Zoo1_Sample17	9.20617	6.18067	5.82049	8.63708	0
	Zoo1_Sample18	9.01423	0	6.81281	7.99462	0
	Zoo1_Sample2	13.293	6.41244	7.40235	10.9475	0
	Zoo1_Sample21	9.27853	6.32782	5.60009	7.73211	0
	Zoo1_Sample23	10.8543	9.1553	6.14082	10.9981	0
	Zoo1_Sample25	19.0298	9.8516	8.17226	11.1277	0
	Zoo1_Sample28	14.9338	8.3084	7.68987	9.34407	0
	Zoo1_Sample3	14.5711	8.87743	5.62057	10.3403	0
	Zoo1_Sample4	10.7381	9.10238	9.52645	10.9022	0
	Zoo1_Sample5	21.8868	7.85469	7.65014	11.1438	0
	Zoo1_Sample7	10.5673	9.81089	7.78223	10.894	5.51289
	Zoo2_Sample1	15.1064	12.1443	0	8.57194	0
	Zoo3_Sample1	5.37137	0	0	0	0
	Zoo3_Sample11	0	0	0	0	0
	Zoo3_Sample12	0	0	0	5.56996	0
	Zoo3_Sample13	14.5716	13.6177	5.34979	7.82828	0
	Zoo3_Sample14	21.8082	14.0311	0	11.6656	5.28192
	Zoo3_Sample2	0	0	0	0	0
	Zoo3_Sample7	7.10361	0	0	0	0
	Zoo3_Sample8	0	0	0	0	0
	Zoo3_Sample9	0	0	0	0	0
	Mean	10.4261	6.59812	4.16434	7.36014	0.431792
	SD	6.64511	5.0058	3.96625	4.43948	1.49485
	CV	0.637355	0.758671	0.95243	0.603179	3.46195
	Zoo3_Sample14	21.8082	14.0311	0	11.6656	5.28192
	Zoo3_Sample13	14.5716	13.6177	5.34979	7.82828	0
	Zoo3_Sample12	0	0	0	5.56996	0
	Zoo3_Sample11	0	0	0	0	0
	Zoo3_Sample9	0	0	0	0	0
	Zoo3_Sample8	0	0	0	0	0
	Zoo3_Sample7	7.10361	0	0	0	0
	Zoo3_Sample4	0	0	0	0	0
	Zoo3_Sample3	0	0	0	0	0
	Zoo3_Sample2	0	0	0	0	0
	Zoo3_Sample1	5.37137	0	0	0	0
	Zoo1_Sample27	9.0458	0	7.49618	8.58779	0
	Zoo1_Sample25	19.0298	9.8516	8.17226	11.1277	0
	Zoo1_Sample24	8.39213	0	5.66678	7.88499	0
	Zoo1_Sample22	16.306	7.61196	8.14228	10.601	0
	Zoo1_Sample20	13.085	10.4942	6.39327	10.449	0
	Zoo1_Sample19	17.462	6.65253	6.48993	9.09155	0
	Zoo1_Sample17	9.20617	6.18067	5.82049	8.63708	0
	Zoo1_Sample15	10.3833	8.03623	8.93552	11.914	0
	Zoo1_Sample14	17.5757	7.16789	7.1337	10.1299	0
	Zoo1_Sample12	16.1014	11.5493	0	8.57089	0
	Zoo1_Sample10	15.0337	12.1001	0	9.77621	0
	Zoo1_Sample8	12.6915	6.10273	6.70817	7.35056	0
	Zoo1_Sample5	21.8868	7.85469	7.65014	11.1438	0
	Zoo1_Sample3	14.5711	8.87743	5.62057	10.3403	0
	Mean	9.98501	5.20512	3.58316	6.42675	0.211277
	SD	7.55619	5.10746	3.60411	4.71308	1.05638
	CV	0.756754	0.981237	1.00585	0.733353	5
	Zoo3_Sample7	7.10361	0	0	0	0
	Zoo3_Sample6	0	0	0	0	0
	Zoo3_Sample5	5.03374	0	0	0	0
	Zoo3_Sample3	0	0	0	0	0
	Zoo3_Sample1	5.37137	0	0	0	0
	Zoo2_Sample1	15.1064	12.1443	0	8.57194	0
	Zoo1_Sample28	14.9338	8.3084	7.68987	9.34407	0
	Zoo1_Sample25	19.0298	9.8516	8.17226	11.1277	0
	Zoo1_Sample24	8.39213	0	5.66678	7.88499	0
	Zoo1_Sample21	9.27853	6.32782	5.60009	7.73211	0
	Zoo1_Sample19	17.462	6.65253	6.48993	9.09155	0
	Zoo1_Sample18	9.01423	0	6.81281	7.99462	0
	Zoo1_Sample14	17.5757	7.16789	7.1337	10.1299	0
	Zoo1_Sample12	16.1014	11.5493	0	8.57089	0
	Zoo1_Sample11	14.9131	11.2882	0	10.8514	0
	Zoo1_Sample10	15.0337	12.1001	0	9.77621	0
	Zoo1_Sample9	16.7166	5.9112	7.0099	9.27994	0
	Zoo1_Sample7	10.5673	9.81089	7.78223	10.894	5.51289
	Zoo1_Sample5	21.8868	7.85469	7.65014	11.1438	0
	Zoo1_Sample4	10.7381	9.10238	9.52645	10.9022	0
	Zoo1_Sample2	13.293	6.41244	7.40235	10.9475	0
	Mean	13.04	6.52736	4.35567	7.57927	0.528551
	SD	11.1824	6.10884	4.01084	5.30676	1.4898
	CV	0.857544	0.935883	0.920833	0.700169	2.81865

## Sheet: giraffe_random
n=3	Sample	Bacteroidetes_Prevotellaceae	Bacteroidetes_Rikenellaceae	Firmicutes_Lachnospiraceae	Firmicutes_Oscillospiraceae	Spirochaetes_Spirochaetaceae
	Zoo7_Sample2	16.1347	7.46325	7.25872	16.9862	12.1581
	Zoo1_Sample1	10.8211	8.55319	8.63867	13.203	9.68146
	Zoo4_Sample2	14.3408	7.91218	6.47212	16.4982	3.88001
	Mean	13.7656	7.97621	7.4565	15.5625	8.5732
	SD	2.7031	0.547783	1.09673	2.05784	4.24887
	CV	0.196367	0.0686771	0.147084	0.132231	0.4956
	Zoo6_Sample4	18.929	10.6527	6.35022	10.8383	5.33394
	Zoo5_Sample2	15.9475	7.9008	4.6683	11.9088	14.1047
	Zoo5_Sample1	20.0078	7.98444	11.8366	14.1634	7.24514
	Mean	18.2947	8.84597	7.61837	12.3035	8.8946
	SD	2.10314	1.56521	3.74862	1.69735	4.61218
	CV	0.114959	0.17694	0.492051	0.137957	0.518537
	Zoo2_Sample1	11.9615	8.64312	4.13842	14.1209	4.88192
	Zoo2_Sample3	22.9975	6.98398	5.12379	13.7296	5.44155
	Zoo7_Sample1	14.0655	10.5171	6.55598	13.8852	11.8548
	Mean	16.3415	8.71473	5.27273	13.9119	7.39277
	SD	5.85947	1.76764	1.21564	0.197006	3.87439
	CV	0.358564	0.202833	0.230552	0.0141609	0.524078
n=6	Zoo5_Sample3	13.1878	9.1881	6.02572	15.1316	10.0404
	Zoo6_Sample3	12.4028	10.9018	6.39474	11.6669	6.12864
	Zoo3_Sample2	19.241	8.34542	13.0412	16.3167	3.71841
	Zoo1_Sample2	23.3903	4.67485	4.80314	9.94307	2.86264
	Zoo3_Sample1	17.179	6.02801	10.0922	20.4918	11.2705
	Zoo7_Sample1	14.0655	10.5171	6.55598	13.8852	11.8548
	Mean	16.5777	8.27588	7.81883	14.5725	7.6459
	SD	4.22134	2.48097	3.11041	3.70782	3.9292
	CV	0.254639	0.299783	0.397811	0.254439	0.513897
	Zoo5_Sample2	15.9475	7.9008	4.6683	11.9088	14.1047
	Zoo5_Sample6	15.1478	9.36098	6.23549	12.8965	9.53118
	Zoo5_Sample1	20.0078	7.98444	11.8366	14.1634	7.24514
	Zoo2_Sample1	11.9615	8.64312	4.13842	14.1209	4.88192
	Zoo5_Sample3	13.1878	9.1881	6.02572	15.1316	10.0404
	Zoo5_Sample7	15.3289	8.51607	6.37286	13.1715	11.1064
	Mean	15.2635	8.59892	6.54623	13.5655	9.48495
	SD	2.76425	0.600274	2.74625	1.1372	3.17763
	CV	0.181101	0.0698081	0.419516	0.0838306	0.335018
	Zoo5_Sample7	15.3289	8.51607	6.37286	13.1715	11.1064
	Zoo4_Sample1	10.2666	9.49615	8.68289	20.5087	3.10627
	Zoo5_Sample2	15.9475	7.9008	4.6683	11.9088	14.1047
	Zoo3_Sample1	17.179	6.02801	10.0922	20.4918	11.2705
	Zoo4_Sample4	9.09948	9.07155	6.23974	18.5342	9.66165
	Zoo2_Sample5	10.7449	10.5234	2.38161	15.4251	9.77569
	Mean	13.0944	8.58933	6.40627	16.6734	9.83754
	SD	3.44362	1.53853	2.75741	3.72224	3.66652
	CV	0.262984	0.179121	0.430423	0.223245	0.372707
n= 10	Zoo5_Sample3	13.1878	9.1881	6.02572	15.1316	10.0404
	Zoo6_Sample3	12.4028	10.9018	6.39474	11.6669	6.12864
	Zoo6_Sample1	17.5399	10.0825	5.65181	6.10583	4.03924
	Zoo4_Sample3	13.7518	8.61756	3.4561	16.7271	8.30914
	Zoo5_Sample5	14.7135	9.76031	9.66735	13.2461	7.19076
	Zoo6_Sample4	18.929	10.6527	6.35022	10.8383	5.33394
	Zoo5_Sample1	20.0078	7.98444	11.8366	14.1634	7.24514
	Zoo2_Sample3	22.9975	6.98398	5.12379	13.7296	5.44155
	Zoo7_Sample1	14.0655	10.5171	6.55598	13.8852	11.8548
	Zoo5_Sample7	15.3289	8.51607	6.37286	13.1715	11.1064
	Mean	16.2924	9.32045	6.74351	12.8666	7.669
	SD	3.44597	1.286	2.35878	2.88668	2.61917
	CV	0.211507	0.137977	0.349785	0.224355	0.341526
	Zoo2_Sample2	20.2899	8.44556	5.61113	13.8066	5.76504
	Zoo1_Sample2	23.3903	4.67485	4.80314	9.94307	2.86264
	Zoo6_Sample2	15.153	9.79042	7.02116	11.5093	9.55923
	Zoo5_Sample1	20.0078	7.98444	11.8366	14.1634	7.24514
	Zoo4_Sample3	13.7518	8.61756	3.4561	16.7271	8.30914
	Zoo2_Sample4	7.58788	9.11141	4.78339	11.5031	13.648
	Zoo5_Sample5	14.7135	9.76031	9.66735	13.2461	7.19076
	Zoo2_Sample3	22.9975	6.98398	5.12379	13.7296	5.44155
	Zoo4_Sample2	14.3408	7.91218	6.47212	16.4982	3.88001
	Zoo3_Sample1	17.179	6.02801	10.0922	20.4918	11.2705
	Mean	16.9411	7.93087	6.8867	14.1618	7.5172
	SD	4.84793	1.63494	2.74808	3.07611	3.31535
	CV	0.286163	0.206149	0.399042	0.217212	0.441035
	Zoo4_Sample4	9.09948	9.07155	6.23974	18.5342	9.66165
	Zoo4_Sample1	10.2666	9.49615	8.68289	20.5087	3.10627
	Zoo5_Sample5	14.7135	9.76031	9.66735	13.2461	7.19076
	Zoo2_Sample3	22.9975	6.98398	5.12379	13.7296	5.44155
	Zoo5_Sample2	15.9475	7.9008	4.6683	11.9088	14.1047
	Zoo1_Sample2	23.3903	4.67485	4.80314	9.94307	2.86264
	Zoo5_Sample1	20.0078	7.98444	11.8366	14.1634	7.24514
	Zoo7_Sample1	14.0655	10.5171	6.55598	13.8852	11.8548
	Zoo5_Sample6	15.1478	9.36098	6.23549	12.8965	9.53118
	Zoo3_Sample2	19.241	8.34542	13.0412	16.3167	3.71841
	Mean	16.4877	8.40955	7.68544	14.5132	7.47172
	SD	4.88063	1.67379	2.98662	3.1338	3.81351
	CV	0.296017	0.199035	0.388608	0.215927	0.510393
n=15	Zoo6_Sample2	15.153	9.79042	7.02116	11.5093	9.55923
	Zoo2_Sample4	7.58788	9.11141	4.78339	11.5031	13.648
	Zoo1_Sample1	10.8211	8.55319	8.63867	13.203	9.68146
	Zoo6_Sample1	17.5399	10.0825	5.65181	6.10583	4.03924
	Zoo1_Sample2	23.3903	4.67485	4.80314	9.94307	2.86264
	Zoo4_Sample2	14.3408	7.91218	6.47212	16.4982	3.88001
	Zoo2_Sample5	10.7449	10.5234	2.38161	15.4251	9.77569
	Zoo6_Sample4	18.929	10.6527	6.35022	10.8383	5.33394
	Zoo5_Sample2	15.9475	7.9008	4.6683	11.9088	14.1047
	Zoo2_Sample2	20.2899	8.44556	5.61113	13.8066	5.76504
	Zoo7_Sample2	16.1347	7.46325	7.25872	16.9862	12.1581
	Zoo7_Sample1	14.0655	10.5171	6.55598	13.8852	11.8548
	Zoo4_Sample4	9.09948	9.07155	6.23974	18.5342	9.66165
	Zoo2_Sample3	22.9975	6.98398	5.12379	13.7296	5.44155
	Zoo6_Sample3	12.4028	10.9018	6.39474	11.6669	6.12864
	Mean	15.2963	8.83898	5.86364	13.0362	8.25965
	SD	4.76967	1.69931	1.43919	3.1122	3.70986
	CV	0.311819	0.192252	0.245443	0.238735	0.449155
	Zoo5_Sample1	20.0078	7.98444	11.8366	14.1634	7.24514
	Zoo5_Sample7	15.3289	8.51607	6.37286	13.1715	11.1064
	Zoo2_Sample1	11.9615	8.64312	4.13842	14.1209	4.88192
	Zoo5_Sample8	13.8903	9.43443	6.87046	13.0837	10.9429
	Zoo5_Sample6	15.1478	9.36098	6.23549	12.8965	9.53118
	Zoo5_Sample5	14.7135	9.76031	9.66735	13.2461	7.19076
	Zoo5_Sample2	15.9475	7.9008	4.6683	11.9088	14.1047
	Zoo4_Sample4	9.09948	9.07155	6.23974	18.5342	9.66165
	Zoo1_Sample2	23.3903	4.67485	4.80314	9.94307	2.86264
	Zoo1_Sample1	10.8211	8.55319	8.63867	13.203	9.68146
	Zoo4_Sample1	10.2666	9.49615	8.68289	20.5087	3.10627
	Zoo4_Sample2	14.3408	7.91218	6.47212	16.4982	3.88001
	Zoo6_Sample3	12.4028	10.9018	6.39474	11.6669	6.12864
	Zoo2_Sample5	10.7449	10.5234	2.38161	15.4251	9.77569
	Zoo4_Sample3	13.7518	8.61756	3.4561	16.7271	8.30914
	Mean	14.121	8.75672	6.45723	14.3398	7.8939
	SD	3.75106	1.44013	2.48083	2.76668	3.25527
	CV	0.265637	0.16446	0.384195	0.192937	0.412378
	Zoo5_Sample4	16.3508	8.40536	8.71011	13.0541	6.58245
	Zoo4_Sample1	10.2666	9.49615	8.68289	20.5087	3.10627
	Zoo6_Sample4	18.929	10.6527	6.35022	10.8383	5.33394
	Zoo5_Sample3	13.1878	9.1881	6.02572	15.1316	10.0404
	Zoo2_Sample4	7.58788	9.11141	4.78339	11.5031	13.648
	Zoo4_Sample3	13.7518	8.61756	3.4561	16.7271	8.30914
	Zoo1_Sample1	10.8211	8.55319	8.63867	13.203	9.68146
	Zoo7_Sample2	16.1347	7.46325	7.25872	16.9862	12.1581
	Zoo5_Sample1	20.0078	7.98444	11.8366	14.1634	7.24514
	Zoo7_Sample1	14.0655	10.5171	6.55598	13.8852	11.8548
	Zoo6_Sample3	12.4028	10.9018	6.39474	11.6669	6.12864
	Zoo6_Sample1	17.5399	10.0825	5.65181	6.10583	4.03924
	Zoo2_Sample3	22.9975	6.98398	5.12379	13.7296	5.44155
	Zoo4_Sample4	9.09948	9.07155	6.23974	18.5342	9.66165
	Zoo6_Sample2	15.153	9.79042	7.02116	11.5093	9.55923
	Mean	14.553	9.1213	6.84864	13.8364	8.186
	SD	4.2523	1.15516	2.01568	3.50505	3.10736
	CV	0.292193	0.126644	0.294318	0.25332	0.379594
n=20	Zoo1_Sample1	10.8211	8.55319	8.63867	13.203	9.68146
	Zoo1_Sample2	23.3903	4.67485	4.80314	9.94307	2.86264
	Zoo2_Sample2	20.2899	8.44556	5.61113	13.8066	5.76504
	Zoo2_Sample3	22.9975	6.98398	5.12379	13.7296	5.44155
	Zoo2_Sample4	7.58788	9.11141	4.78339	11.5031	13.648
	Zoo7_Sample2	16.1347	7.46325	7.25872	16.9862	12.1581
	Zoo6_Sample4	18.929	10.6527	6.35022	10.8383	5.33394
	Zoo3_Sample1	17.179	6.02801	10.0922	20.4918	11.2705
	Zoo3_Sample2	19.241	8.34542	13.0412	16.3167	3.71841
	Zoo4_Sample4	9.09948	9.07155	6.23974	18.5342	9.66165
	Zoo4_Sample2	14.3408	7.91218	6.47212	16.4982	3.88001
	Zoo5_Sample2	15.9475	7.9008	4.6683	11.9088	14.1047
	Zoo5_Sample3	13.1878	9.1881	6.02572	15.1316	10.0404
	Zoo5_Sample4	16.3508	8.40536	8.71011	13.0541	6.58245
	Zoo5_Sample6	15.1478	9.36098	6.23549	12.8965	9.53118
	Zoo5_Sample7	15.3289	8.51607	6.37286	13.1715	11.1064
	Zoo5_Sample8	13.8903	9.43443	6.87046	13.0837	10.9429
	Zoo6_Sample1	17.5399	10.0825	5.65181	6.10583	4.03924
	Zoo6_Sample2	15.153	9.79042	7.02116	11.5093	9.55923
	Zoo6_Sample3	12.4028	10.9018	6.39474	11.6669	6.12864
	Mean	15.748	8.54113	6.81825	13.5189	8.27282
	SD	4.09653	1.49007	2.0145	3.20601	3.47963
	CV	0.260131	0.174458	0.295457	0.23715	0.42061
	Zoo1_Sample1	10.8211	8.55319	8.63867	13.203	9.68146
	Zoo1_Sample2	23.3903	4.67485	4.80314	9.94307	2.86264
	Zoo2_Sample1	11.9615	8.64312	4.13842	14.1209	4.88192
	Zoo2_Sample3	22.9975	6.98398	5.12379	13.7296	5.44155
	Zoo2_Sample4	7.58788	9.11141	4.78339	11.5031	13.648
	Zoo2_Sample5	10.7449	10.5234	2.38161	15.4251	9.77569
	Zoo3_Sample2	19.241	8.34542	13.0412	16.3167	3.71841
	Zoo4_Sample1	10.2666	9.49615	8.68289	20.5087	3.10627
	Zoo4_Sample2	14.3408	7.91218	6.47212	16.4982	3.88001
	Zoo4_Sample3	13.7518	8.61756	3.4561	16.7271	8.30914
	Zoo4_Sample4	9.09948	9.07155	6.23974	18.5342	9.66165
	Zoo5_Sample2	15.9475	7.9008	4.6683	11.9088	14.1047
	Zoo5_Sample3	13.1878	9.1881	6.02572	15.1316	10.0404
	Zoo5_Sample4	16.3508	8.40536	8.71011	13.0541	6.58245
	Zoo5_Sample6	15.1478	9.36098	6.23549	12.8965	9.53118
	Zoo5_Sample7	15.3289	8.51607	6.37286	13.1715	11.1064
	Zoo6_Sample1	17.5399	10.0825	5.65181	6.10583	4.03924
	Zoo6_Sample3	12.4028	10.9018	6.39474	11.6669	6.12864
	Zoo6_Sample4	18.929	10.6527	6.35022	10.8383	5.33394
	Zoo7_Sample2	16.1347	7.46325	7.25872	16.9862	12.1581
	Mean	14.7586	8.72022	6.27145	13.9135	7.69959
	SD	4.26854	1.40897	2.30048	3.26378	3.55312
	CV	0.289224	0.161575	0.366819	0.234577	0.461469
	Zoo1_Sample1	10.8211	8.55319	8.63867	13.203	9.68146
	Zoo1_Sample2	23.3903	4.67485	4.80314	9.94307	2.86264
	Zoo2_Sample2	20.2899	8.44556	5.61113	13.8066	5.76504
	Zoo2_Sample3	22.9975	6.98398	5.12379	13.7296	5.44155
	Zoo2_Sample4	7.58788	9.11141	4.78339	11.5031	13.648
	Zoo2_Sample5	10.7449	10.5234	2.38161	15.4251	9.77569
	Zoo3_Sample2	19.241	8.34542	13.0412	16.3167	3.71841
	Zoo4_Sample1	10.2666	9.49615	8.68289	20.5087	3.10627
	Zoo4_Sample2	14.3408	7.91218	6.47212	16.4982	3.88001
	Zoo4_Sample3	13.7518	8.61756	3.4561	16.7271	8.30914
	Zoo4_Sample4	9.09948	9.07155	6.23974	18.5342	9.66165
	Zoo5_Sample1	20.0078	7.98444	11.8366	14.1634	7.24514
	Zoo5_Sample3	13.1878	9.1881	6.02572	15.1316	10.0404
	Zoo5_Sample4	16.3508	8.40536	8.71011	13.0541	6.58245
	Zoo5_Sample5	14.7135	9.76031	9.66735	13.2461	7.19076
	Zoo5_Sample8	13.8903	9.43443	6.87046	13.0837	10.9429
	Zoo6_Sample1	17.5399	10.0825	5.65181	6.10583	4.03924
	Zoo6_Sample2	15.153	9.79042	7.02116	11.5093	9.55923
	Zoo6_Sample4	18.929	10.6527	6.35022	10.8383	5.33394
	Zoo7_Sample1	14.0655	10.5171	6.55598	13.8852	11.8548
	Mean	15.3184	8.87753	6.89616	13.8607	7.43194
	SD	4.48567	1.38293	2.60128	3.15553	3.14237
	CV	0.292828	0.155779	0.377207	0.227661	0.42282
n=25	Zoo1_Sample1	10.8211	8.55319	8.63867	13.203	9.68146
	Zoo1_Sample2	23.3903	4.67485	4.80314	9.94307	2.86264
	Zoo2_Sample1	11.9615	8.64312	4.13842	14.1209	4.88192
	Zoo2_Sample2	20.2899	8.44556	5.61113	13.8066	5.76504
	Zoo2_Sample3	22.9975	6.98398	5.12379	13.7296	5.44155
	Zoo2_Sample4	7.58788	9.11141	4.78339	11.5031	13.648
	Zoo2_Sample5	10.7449	10.5234	2.38161	15.4251	9.77569
	Zoo3_Sample1	17.179	6.02801	10.0922	20.4918	11.2705
	Zoo4_Sample1	10.2666	9.49615	8.68289	20.5087	3.10627
	Zoo4_Sample2	14.3408	7.91218	6.47212	16.4982	3.88001
	Zoo4_Sample3	13.7518	8.61756	3.4561	16.7271	8.30914
	Zoo4_Sample4	9.09948	9.07155	6.23974	18.5342	9.66165
	Zoo5_Sample1	20.0078	7.98444	11.8366	14.1634	7.24514
	Zoo5_Sample2	15.9475	7.9008	4.6683	11.9088	14.1047
	Zoo5_Sample4	16.3508	8.40536	8.71011	13.0541	6.58245
	Zoo5_Sample5	14.7135	9.76031	9.66735	13.2461	7.19076
	Zoo5_Sample6	15.1478	9.36098	6.23549	12.8965	9.53118
	Zoo5_Sample7	15.3289	8.51607	6.37286	13.1715	11.1064
	Zoo5_Sample8	13.8903	9.43443	6.87046	13.0837	10.9429
	Zoo6_Sample1	17.5399	10.0825	5.65181	6.10583	4.03924
	Zoo6_Sample2	15.153	9.79042	7.02116	11.5093	9.55923
	Zoo6_Sample3	12.4028	10.9018	6.39474	11.6669	6.12864
	Zoo7_Sample1	14.0655	10.5171	6.55598	13.8852	11.8548
	Zoo7_Sample2	16.1347	7.46325	7.25872	16.9862	12.1581
	Mean	14.9631	8.6741	6.56945	14.007	8.28031
	SD	4.01428	1.43564	2.19747	3.20142	3.31697
	CV	0.26828	0.165509	0.334499	0.228558	0.400585
	Zoo1_Sample2	23.3903	4.67485	4.80314	9.94307	2.86264
	Zoo2_Sample1	11.9615	8.64312	4.13842	14.1209	4.88192
	Zoo2_Sample2	20.2899	8.44556	5.61113	13.8066	5.76504
	Zoo2_Sample3	22.9975	6.98398	5.12379	13.7296	5.44155
	Zoo2_Sample4	7.58788	9.11141	4.78339	11.5031	13.648
	Zoo2_Sample5	10.7449	10.5234	2.38161	15.4251	9.77569
	Zoo3_Sample1	17.179	6.02801	10.0922	20.4918	11.2705
	Zoo3_Sample2	19.241	8.34542	13.0412	16.3167	3.71841
	Zoo4_Sample1	10.2666	9.49615	8.68289	20.5087	3.10627
	Zoo4_Sample2	14.3408	7.91218	6.47212	16.4982	3.88001
	Zoo4_Sample3	13.7518	8.61756	3.4561	16.7271	8.30914
	Zoo4_Sample4	9.09948	9.07155	6.23974	18.5342	9.66165
	Zoo5_Sample1	20.0078	7.98444	11.8366	14.1634	7.24514
	Zoo5_Sample2	15.9475	7.9008	4.6683	11.9088	14.1047
	Zoo5_Sample3	13.1878	9.1881	6.02572	15.1316	10.0404
	Zoo5_Sample4	16.3508	8.40536	8.71011	13.0541	6.58245
	Zoo5_Sample5	14.7135	9.76031	9.66735	13.2461	7.19076
	Zoo5_Sample6	15.1478	9.36098	6.23549	12.8965	9.53118
	Zoo5_Sample8	13.8903	9.43443	6.87046	13.0837	10.9429
	Zoo6_Sample1	17.5399	10.0825	5.65181	6.10583	4.03924
	Zoo6_Sample2	15.153	9.79042	7.02116	11.5093	9.55923
	Zoo6_Sample3	12.4028	10.9018	6.39474	11.6669	6.12864
	Zoo6_Sample4	18.929	10.6527	6.35022	10.8383	5.33394
	Zoo7_Sample1	14.0655	10.5171	6.55598	13.8852	11.8548
	Zoo7_Sample2	16.1347	7.46325	7.25872	16.9862	12.1581
	Mean	15.3728	8.77181	6.72289	14.0832	7.88129
	SD	4.0121	1.46363	2.48648	3.23316	3.36472
	CV	0.260986	0.166856	0.369853	0.229575	0.426925
	Zoo1_Sample1	10.8211	8.55319	8.63867	13.203	9.68146
	Zoo1_Sample2	23.3903	4.67485	4.80314	9.94307	2.86264
	Zoo2_Sample1	11.9615	8.64312	4.13842	14.1209	4.88192
	Zoo2_Sample2	20.2899	8.44556	5.61113	13.8066	5.76504
	Zoo2_Sample3	22.9975	6.98398	5.12379	13.7296	5.44155
	Zoo2_Sample4	7.58788	9.11141	4.78339	11.5031	13.648
	Zoo2_Sample5	10.7449	10.5234	2.38161	15.4251	9.77569
	Zoo3_Sample1	17.179	6.02801	10.0922	20.4918	11.2705
	Zoo3_Sample2	19.241	8.34542	13.0412	16.3167	3.71841
	Zoo4_Sample1	10.2666	9.49615	8.68289	20.5087	3.10627
	Zoo4_Sample2	14.3408	7.91218	6.47212	16.4982	3.88001
	Zoo4_Sample3	13.7518	8.61756	3.4561	16.7271	8.30914
	Zoo4_Sample4	9.09948	9.07155	6.23974	18.5342	9.66165
	Zoo5_Sample1	20.0078	7.98444	11.8366	14.1634	7.24514
	Zoo5_Sample3	13.1878	9.1881	6.02572	15.1316	10.0404
	Zoo5_Sample4	16.3508	8.40536	8.71011	13.0541	6.58245
	Zoo5_Sample5	14.7135	9.76031	9.66735	13.2461	7.19076
	Zoo5_Sample6	15.1478	9.36098	6.23549	12.8965	9.53118
	Zoo5_Sample7	15.3289	8.51607	6.37286	13.1715	11.1064
	Zoo5_Sample8	13.8903	9.43443	6.87046	13.0837	10.9429
	Zoo6_Sample1	17.5399	10.0825	5.65181	6.10583	4.03924
	Zoo6_Sample2	15.153	9.79042	7.02116	11.5093	9.55923
	Zoo6_Sample3	12.4028	10.9018	6.39474	11.6669	6.12864
	Zoo6_Sample4	18.929	10.6527	6.35022	10.8383	5.33394
	Zoo7_Sample2	16.1347	7.46325	7.25872	16.9862	12.1581
	Mean	15.2183	8.71787	6.87438	14.1065	7.67443
	SD	4.10493	1.40903	2.47783	3.21264	3.09411
	CV	0.269736	0.161626	0.360445	0.227742	0.403171

## Sheet: lion_random
n=3	Sample	Bacteroidetes_Bacteroidaceae	Firmicutes_Erysipelotrichaceae	Firmicutes_Clostridiaceae	Firmicutes_Lachnospiraceae	Firmicutes_Peptostreptococcaceae	Fusobacteria_Fusobacteriaceae	Proteobacteria_Enterobacteriaceae
	Zoo1_Sample2	15.4706	7.67629	17.8165	6.68379	7.61383	18.7118	0
	Zoo4_Sample6	18.8289	0	0	9.79882	9.39723	39.681	0
	Zoo4_Sample7	9.76812	7.13338	0	7.4177	0	23.6115	0
	Mean	14.6892	4.93656	5.93883	7.96677	5.67035	27.3348	0
	SD	4.58064	4.28379	10.2864	1.62849	4.99097	10.9692	0
	CV	0.311838	0.867769	1.73205	0.20441	0.880187	0.401291	#DIV/0!
	Zoo4_Sample11	19.923	14.3371	6.7217	9.13605	9.60154	21.6423	0
	Zoo4_Sample3	0	17.1107	19.4871	16.0417	16.6067	6.76342	0
	Zoo2_Sample4	0	0	28.5806	5.34121	12.7496	20.6715	0
	Mean	6.64101	10.4826	18.2631	10.173	12.9859	16.3591	0
	SD	11.5026	9.18353	10.9807	5.42506	3.50854	8.32423	0
	CV	1.73205	0.876072	0.601252	0.533282	0.27018	0.508845	#DIV/0!
	Zoo4_Sample8	26.9565	0	0	0	0	37.8261	0
	Zoo5_Sample2	24.6463	0	5.98553	0	5.37915	29.1452	5.1053
	Zoo4_Sample3	0	17.1107	19.4871	16.0417	16.6067	6.76342	0
	Mean	17.2009	5.70358	8.49086	5.34722	7.3286	24.5782	1.70177
	SD	14.9412	9.87888	9.98218	9.26165	8.47323	16.027	2.94755
	CV	0.868625	1.73205	1.17564	1.73205	1.15619	0.652082	1.73205
n=6	Zoo1_Sample2	15.4706	7.67629	17.8165	6.68379	7.61383	18.7118	0
	Zoo4_Sample9	17.7877	6.93893	0	7.70347	8.6906	35.256	0
	Zoo1_Sample1	0	0	7.7141	0	5.05557	12.8423	31.3503
	Zoo3_Sample3	0	0	18.7073	0	27.6132	0	6.96841
	Zoo4_Sample4	0	20.2945	5.50519	10.7928	22.6735	0	0
	Zoo4_Sample1	7.71672	6.06041	14.6338	0	11.4608	34.7823	0
	Mean	6.82916	6.82835	10.7295	4.19667	13.8513	16.9321	6.38646
	SD	8.19101	7.42846	7.49163	4.79225	9.11963	15.7967	12.5434
	CV	1.19942	1.08789	0.698228	1.14192	0.658398	0.932946	1.96406
	Zoo2_Sample5	42.9598	0	0	20.3384	0	13.5856	0
	Zoo1_Sample1	0	0	7.7141	0	5.05557	12.8423	31.3503
	Zoo5_Sample2	24.6463	0	5.98553	0	5.37915	29.1452	5.1053
	Zoo5_Sample1	18.314	0	0	0	0	20.9645	41.9998
	Zoo5_Sample3	25.0134	0	0	15.0038	5.47739	16.8618	12.1684
	Zoo1_Sample2	15.4706	7.67629	17.8165	6.68379	7.61383	18.7118	0
	Mean	21.0673	1.27938	5.25269	7.00433	3.92099	18.6852	15.104
	SD	14.0741	3.13383	7.0316	8.82127	3.16927	5.96788	17.6192
	CV	0.668051	2.44949	1.33867	1.2594	0.808282	0.319391	1.16653
	Zoo6_Sample1	12.1653	0	0	17.4962	9.33032	25.2985	24.3404
	Zoo3_Sample2	0	0	14.3474	12.8338	31.5952	0	6.16134
	Zoo3_Sample1	0	0	12.9937	12.1324	19.7699	0	0
	Zoo4_Sample5	8.8174	0	0	0	0	39.9643	0
	Zoo2_Sample1	27.607	0	0	6.59215	6.61755	20.4496	0
	Zoo1_Sample2	15.4706	7.67629	17.8165	6.68379	7.61383	18.7118	0
	Mean	10.6767	1.27938	7.52627	9.28973	12.4878	17.404	5.08362
	SD	10.4238	3.13383	8.39338	6.13766	11.3336	15.4148	9.75046
	CV	0.976308	2.44949	1.11521	0.660693	0.907574	0.8857	1.91801
n= 10	Zoo1_Sample2	15.4706	7.67629	17.8165	6.68379	7.61383	18.7118	0
	Zoo2_Sample1	27.607	0	0	6.59215	6.61755	20.4496	0
	Zoo2_Sample2	14.9285	0	0	0	7.7285	19.6339	0
	Zoo3_Sample1	0	0	12.9937	12.1324	19.7699	0	0
	Zoo3_Sample2	0	0	14.3474	12.8338	31.5952	0	6.16134
	Zoo4_Sample10	0	29.0476	5.17763	11.6704	12.9781	9.08541	0
	Zoo4_Sample2	0	15.5211	19.034	8.39578	13.7002	15.9778	0
	Zoo4_Sample6	18.8289	0	0	9.79882	9.39723	39.681	0
	Zoo5_Sample1	18.314	0	0	0	0	20.9645	41.9998
	Zoo6_Sample1	12.1653	0	0	17.4962	9.33032	25.2985	24.3404
	Mean	10.7314	5.2245	6.93692	8.56034	11.8731	16.9802	7.25016
	SD	10.0589	9.83553	8.16499	5.53835	8.64347	11.8437	14.4097
	CV	0.937332	1.88258	1.17703	0.646977	0.727989	0.697499	1.9875
	Zoo3_Sample1	0	0	12.9937	12.1324	19.7699	0	0
	Zoo4_Sample11	19.923	14.3371	6.7217	9.13605	9.60154	21.6423	0
	Zoo4_Sample2	0	15.5211	19.034	8.39578	13.7002	15.9778	0
	Zoo1_Sample1	0	0	7.7141	0	5.05557	12.8423	31.3503
	Zoo2_Sample5	42.9598	0	0	20.3384	0	13.5856	0
	Zoo4_Sample7	9.76812	7.13338	0	7.4177	0	23.6115	0
	Zoo4_Sample2	0	15.5211	19.034	8.39578	13.7002	15.9778	0
	Zoo2_Sample4	0	0	28.5806	5.34121	12.7496	20.6715	0
	Zoo2_Sample1	27.607	0	0	6.59215	6.61755	20.4496	0
	Zoo1_Sample3	0	17.9434	20.7174	8.1387	29.3743	0	0
	Mean	10.0258	7.04561	11.4795	8.58882	11.0569	14.4758	3.13503
	SD	15.2566	7.91487	10.1454	5.17323	9.01007	8.40611	9.91384
	CV	1.52173	1.12338	0.883785	0.602321	0.814884	0.580699	3.16228
	Zoo2_Sample2	14.9285	0	0	0	7.7285	19.6339	0
	Zoo2_Sample5	42.9598	0	0	20.3384	0	13.5856	0
	Zoo4_Sample9	17.7877	6.93893	0	7.70347	8.6906	35.256	0
	Zoo4_Sample5	8.8174	0	0	0	0	39.9643	0
	Zoo2_Sample1	27.607	0	0	6.59215	6.61755	20.4496	0
	Zoo4_Sample11	19.923	14.3371	6.7217	9.13605	9.60154	21.6423	0
	Zoo5_Sample3	25.0134	0	0	15.0038	5.47739	16.8618	12.1684
	Zoo4_Sample1	7.71672	6.06041	14.6338	0	11.4608	34.7823	0
	Zoo6_Sample2	0	0	0	0	0	0	26.3957
	Zoo4_Sample7	9.76812	7.13338	0	7.4177	0	23.6115	0
	Mean	17.4522	3.44699	2.13555	6.61916	4.95764	22.5787	3.85641
	SD	12.2768	4.97213	4.87311	7.00732	4.55593	11.787	8.79445
	CV	0.703455	1.44246	2.28189	1.05864	0.918971	0.522041	2.28048
n= 15	Zoo1_Sample3	0	17.9434	20.7174	8.1387	29.3743	0	0
	Zoo4_Sample5	8.8174	0	0	0	0	39.9643	0
	Zoo6_Sample1	12.1653	0	0	17.4962	9.33032	25.2985	24.3404
	Zoo5_Sample4	25.2996	0	7.30973	11.2491	7.14559	18.0555	0
	Zoo5_Sample3	25.0134	0	0	15.0038	5.47739	16.8618	12.1684
	Zoo4_Sample9	17.7877	6.93893	0	7.70347	8.6906	35.256	0
	Zoo3_Sample2	0	0	14.3474	12.8338	31.5952	0	6.16134
	Zoo4_Sample7	9.76812	7.13338	0	7.4177	0	23.6115	0
	Zoo4_Sample11	19.923	14.3371	6.7217	9.13605	9.60154	21.6423	0
	Zoo5_Sample1	18.314	0	0	0	0	20.9645	41.9998
	Zoo4_Sample10	0	29.0476	5.17763	11.6704	12.9781	9.08541	0
	Zoo2_Sample2	14.9285	0	0	0	7.7285	19.6339	0
	Zoo6_Sample2	0	0	0	0	0	0	26.3957
	Zoo1_Sample4	0	6.54741	26.1966	0	30.2075	17.2385	0
	Zoo2_Sample1	27.607	0	0	6.59215	6.61755	20.4496	0
	Mean	11.9749	5.46319	5.3647	7.14943	10.5831	17.8708	7.40437
	SD	10.2457	8.7239	8.51488	5.97311	11.0238	11.7982	13.1389
	CV	0.855598	1.59685	1.5872	0.835466	1.04165	0.660197	1.77448
	Zoo4_Sample2	0	15.5211	19.034	8.39578	13.7002	15.9778	0
	Zoo1_Sample1	0	0	7.7141	0	5.05557	12.8423	31.3503
	Zoo1_Sample2	15.4706	7.67629	17.8165	6.68379	7.61383	18.7118	0
	Zoo4_Sample4	0	20.2945	5.50519	10.7928	22.6735	0	0
	Zoo2_Sample3	30.1816	0	0	11.419	0	16.6144	7.13627
	Zoo4_Sample11	19.923	14.3371	6.7217	9.13605	9.60154	21.6423	0
	Zoo4_Sample6	18.8289	0	0	9.79882	9.39723	39.681	0
	Zoo4_Sample10	0	29.0476	5.17763	11.6704	12.9781	9.08541	0
	Zoo4_Sample7	9.76812	7.13338	0	7.4177	0	23.6115	0
	Zoo2_Sample2	14.9285	0	0	0	7.7285	19.6339	0
	Zoo4_Sample5	8.8174	0	0	0	0	39.9643	0
	Zoo1_Sample3	0	17.9434	20.7174	8.1387	29.3743	0	0
	Zoo6_Sample2	0	0	0	0	0	0	26.3957
	Zoo2_Sample6	6.2419	0	6.63591	15.9676	19.4982	18.7361	8.92218
	Zoo5_Sample2	24.6463	0	5.98553	0	5.37915	29.1452	5.1053
	Mean	9.92042	7.46356	6.35386	6.62804	9.53334	17.7097	5.26065
	SD	10.2397	9.62991	7.29492	5.31161	8.87478	12.5584	10.0749
	CV	1.03219	1.29026	1.14811	0.801384	0.930921	0.709127	1.91515
	Zoo5_Sample1	18.314	0	0	0	0	20.9645	41.9998
	Zoo5_Sample4	25.2996	0	7.30973	11.2491	7.14559	18.0555	0
	Zoo2_Sample4	0	0	28.5806	5.34121	12.7496	20.6715	0
	Zoo4_Sample7	9.76812	7.13338	0	7.4177	0	23.6115	0
	Zoo4_Sample11	19.923	14.3371	6.7217	9.13605	9.60154	21.6423	0
	Zoo2_Sample5	42.9598	0	0	20.3384	0	13.5856	0
	Zoo6_Sample1	12.1653	0	0	17.4962	9.33032	25.2985	24.3404
	Zoo1_Sample1	0	0	7.7141	0	5.05557	12.8423	31.3503
	Zoo4_Sample6	18.8289	0	0	9.79882	9.39723	39.681	0
	Zoo2_Sample2	14.9285	0	0	0	7.7285	19.6339	0
	Zoo4_Sample10	0	29.0476	5.17763	11.6704	12.9781	9.08541	0
	Zoo5_Sample3	25.0134	0	0	15.0038	5.47739	16.8618	12.1684
	Zoo4_Sample8	26.9565	0	0	0	0	37.8261	0
	Zoo3_Sample1	0	0	12.9937	12.1324	19.7699	0	0
	Zoo6_Sample2	0	0	0	0	0	0	26.3957
	Mean	14.2771	3.36788	4.5665	7.97228	6.61558	18.6507	9.08364
	SD	12.9104	8.15065	7.82771	6.88941	5.97162	11.1748	14.5071
	CV	0.904274	2.42012	1.71416	0.864171	0.902661	0.599164	1.59706
n=20	Zoo4_Sample3	0	17.1107	19.4871	16.0417	16.6067	6.76342	0
	Zoo4_Sample8	26.9565	0	0	0	0	37.8261	0
	Zoo5_Sample1	18.314	0	0	0	0	20.9645	41.9998
	Zoo4_Sample5	8.8174	0	0	0	0	39.9643	0
	Zoo1_Sample2	15.4706	7.67629	17.8165	6.68379	7.61383	18.7118	0
	Zoo2_Sample6	6.2419	0	6.63591	15.9676	19.4982	18.7361	8.92218
	Zoo5_Sample3	25.0134	0	0	15.0038	5.47739	16.8618	12.1684
	Zoo4_Sample10	0	29.0476	5.17763	11.6704	12.9781	9.08541	0
	Zoo4_Sample1	7.71672	6.06041	14.6338	0	11.4608	34.7823	0
	Zoo3_Sample3	0	0	18.7073	0	27.6132	0	6.96841
	Zoo6_Sample1	12.1653	0	0	17.4962	9.33032	25.2985	24.3404
	Zoo5_Sample4	25.2996	0	7.30973	11.2491	7.14559	18.0555	0
	Zoo4_Sample6	18.8289	0	0	9.79882	9.39723	39.681	0
	Zoo2_Sample2	14.9285	0	0	0	7.7285	19.6339	0
	Zoo4_Sample4	0	20.2945	5.50519	10.7928	22.6735	0	0
	Zoo3_Sample1	0	0	12.9937	12.1324	19.7699	0	0
	Zoo2_Sample3	30.1816	0	0	11.419	0	16.6144	7.13627
	Zoo4_Sample11	19.923	14.3371	6.7217	9.13605	9.60154	21.6423	0
	Zoo1_Sample1	0	0	7.7141	0	5.05557	12.8423	31.3503
	Zoo3_Sample2	0	0	14.3474	12.8338	31.5952	0	6.16134
	Mean	11.4929	4.72633	6.8525	8.01127	11.1773	17.8732	6.95236
	SD	10.6002	8.59268	7.09375	6.51152	9.21859	13.0535	12.0037
	CV	0.922326	1.81804	1.03521	0.812795	0.824762	0.730341	1.72657
	Zoo6_Sample2	0	0	0	0	0	0	26.3957
	Zoo5_Sample4	25.2996	0	7.30973	11.2491	7.14559	18.0555	0
	Zoo5_Sample2	24.6463	0	5.98553	0	5.37915	29.1452	5.1053
	Zoo5_Sample1	18.314	0	0	0	0	20.9645	41.9998
	Zoo4_Sample11	19.923	14.3371	6.7217	9.13605	9.60154	21.6423	0
	Zoo4_Sample9	17.7877	6.93893	0	7.70347	8.6906	35.256	0
	Zoo4_Sample8	26.9565	0	0	0	0	37.8261	0
	Zoo4_Sample6	18.8289	0	0	9.79882	9.39723	39.681	0
	Zoo4_Sample4	0	20.2945	5.50519	10.7928	22.6735	0	0
	Zoo4_Sample1	7.71672	6.06041	14.6338	0	11.4608	34.7823	0
	Zoo3_Sample3	0	0	18.7073	0	27.6132	0	6.96841
	Zoo3_Sample2	0	0	14.3474	12.8338	31.5952	0	6.16134
	Zoo3_Sample1	0	0	12.9937	12.1324	19.7699	0	0
	Zoo2_Sample5	42.9598	0	0	20.3384	0	13.5856	0
	Zoo2_Sample4	0	0	28.5806	5.34121	12.7496	20.6715	0
	Zoo2_Sample3	30.1816	0	0	11.419	0	16.6144	7.13627
	Zoo2_Sample2	14.9285	0	0	0	7.7285	19.6339	0
	Zoo2_Sample1	27.607	0	0	6.59215	6.61755	20.4496	0
	Zoo1_Sample4	0	6.54741	26.1966	0	30.2075	17.2385	0
	Zoo1_Sample2	15.4706	7.67629	17.8165	6.68379	7.61383	18.7118	0
	Mean	14.531	3.09273	7.93991	6.20105	10.9122	18.2129	4.68834
	SD	12.9671	5.6791	9.35623	6.00613	10.2291	13.0711	10.7229
	CV	0.892377	1.83627	1.17838	0.968567	0.937406	0.717684	2.28713
	Zoo6_Sample1	12.1653	0	0	17.4962	9.33032	25.2985	24.3404
	Zoo5_Sample4	25.2996	0	7.30973	11.2491	7.14559	18.0555	0
	Zoo5_Sample3	25.0134	0	0	15.0038	5.47739	16.8618	12.1684
	Zoo5_Sample2	24.6463	0	5.98553	0	5.37915	29.1452	5.1053
	Zoo4_Sample11	19.923	14.3371	6.7217	9.13605	9.60154	21.6423	0
	Zoo4_Sample10	0	29.0476	5.17763	11.6704	12.9781	9.08541	0
	Zoo4_Sample9	17.7877	6.93893	0	7.70347	8.6906	35.256	0
	Zoo4_Sample4	0	20.2945	5.50519	10.7928	22.6735	0	0
	Zoo4_Sample2	0	15.5211	19.034	8.39578	13.7002	15.9778	0
	Zoo4_Sample1	7.71672	6.06041	14.6338	0	11.4608	34.7823	0
	Zoo3_Sample3	0	0	18.7073	0	27.6132	0	6.96841
	Zoo3_Sample1	0	0	12.9937	12.1324	19.7699	0	0
	Zoo2_Sample6	6.2419	0	6.63591	15.9676	19.4982	18.7361	8.92218
	Zoo2_Sample5	42.9598	0	0	20.3384	0	13.5856	0
	Zoo2_Sample4	0	0	28.5806	5.34121	12.7496	20.6715	0
	Zoo2_Sample2	14.9285	0	0	0	7.7285	19.6339	0
	Zoo2_Sample1	27.607	0	0	6.59215	6.61755	20.4496	0
	Zoo1_Sample4	0	6.54741	26.1966	0	30.2075	17.2385	0
	Zoo1_Sample3	0	17.9434	20.7174	8.1387	29.3743	0	0
	Zoo1_Sample1	0	0	7.7141	0	5.05557	12.8423	31.3503
	Mean	11.2145	5.83452	9.29566	7.99791	13.2526	16.4631	4.44275
	SD	12.8724	8.79882	9.16078	6.48262	8.74856	10.679	8.83425
	CV	1.14784	1.50806	0.985489	0.810539	0.66014	0.648666	1.98846
n=25	Zoo5_Sample4	25.2996	0	7.30973	11.2491	7.14559	18.0555	0
	Zoo2_Sample4	0	0	28.5806	5.34121	12.7496	20.6715	0
	Zoo2_Sample2	14.9285	0	0	0	7.7285	19.6339	0
	Zoo1_Sample4	0	6.54741	26.1966	0	30.2075	17.2385	0
	Zoo1_Sample1	0	0	7.7141	0	5.05557	12.8423	31.3503
	Zoo4_Sample3	0	17.1107	19.4871	16.0417	16.6067	6.76342	0
	Zoo4_Sample1	7.71672	6.06041	14.6338	0	11.4608	34.7823	0
	Zoo6_Sample1	12.1653	0	0	17.4962	9.33032	25.2985	24.3404
	Zoo2_Sample3	30.1816	0	0	11.419	0	16.6144	7.13627
	Zoo5_Sample2	24.6463	0	5.98553	0	5.37915	29.1452	5.1053
	Zoo2_Sample6	6.2419	0	6.63591	15.9676	19.4982	18.7361	8.92218
	Zoo2_Sample5	42.9598	0	0	20.3384	0	13.5856	0
	Zoo5_Sample3	25.0134	0	0	15.0038	5.47739	16.8618	12.1684
	Zoo1_Sample2	15.4706	7.67629	17.8165	6.68379	7.61383	18.7118	0
	Zoo4_Sample5	8.8174	0	0	0	0	39.9643	0
	Zoo2_Sample1	27.607	0	0	6.59215	6.61755	20.4496	0
	Zoo5_Sample1	18.314	0	0	0	0	20.9645	41.9998
	Zoo6_Sample2	0	0	0	0	0	0	26.3957
	Zoo4_Sample9	17.7877	6.93893	0	7.70347	8.6906	35.256	0
	Zoo3_Sample2	0	0	14.3474	12.8338	31.5952	0	6.16134
	Zoo3_Sample3	0	0	18.7073	0	27.6132	0	6.96841
	Zoo4_Sample8	26.9565	0	0	0	0	37.8261	0
	Zoo4_Sample11	19.923	14.3371	6.7217	9.13605	9.60154	21.6423	0
	Zoo3_Sample1	0	0	12.9937	12.1324	19.7699	0	0
	Zoo4_Sample10	0	29.0476	5.17763	11.6704	12.9781	9.08541	0
	Mean	12.9612	3.50874	7.69231	7.18437	10.2048	18.1652	6.82192
	SD	12.5064	7.13263	8.95495	6.86571	9.42242	11.5871	11.6614
	CV	0.964912	2.03282	1.16414	0.955646	0.923335	0.637874	1.7094
	Zoo6_Sample2	0	0	0	0	0	0	26.3957
	Zoo6_Sample1	12.1653	0	0	17.4962	9.33032	25.2985	24.3404
	Zoo5_Sample4	25.2996	0	7.30973	11.2491	7.14559	18.0555	0
	Zoo5_Sample3	25.0134	0	0	15.0038	5.47739	16.8618	12.1684
	Zoo5_Sample2	24.6463	0	5.98553	0	5.37915	29.1452	5.1053
	Zoo5_Sample1	18.314	0	0	0	0	20.9645	41.9998
	Zoo4_Sample9	17.7877	6.93893	0	7.70347	8.6906	35.256	0
	Zoo4_Sample8	26.9565	0	0	0	0	37.8261	0
	Zoo4_Sample6	18.8289	0	0	9.79882	9.39723	39.681	0
	Zoo4_Sample5	8.8174	0	0	0	0	39.9643	0
	Zoo4_Sample4	0	20.2945	5.50519	10.7928	22.6735	0	0
	Zoo4_Sample2	0	15.5211	19.034	8.39578	13.7002	15.9778	0
	Zoo4_Sample1	7.71672	6.06041	14.6338	0	11.4608	34.7823	0
	Zoo3_Sample3	0	0	18.7073	0	27.6132	0	6.96841
	Zoo3_Sample2	0	0	14.3474	12.8338	31.5952	0	6.16134
	Zoo2_Sample6	6.2419	0	6.63591	15.9676	19.4982	18.7361	8.92218
	Zoo2_Sample5	42.9598	0	0	20.3384	0	13.5856	0
	Zoo2_Sample4	0	0	28.5806	5.34121	12.7496	20.6715	0
	Zoo2_Sample3	30.1816	0	0	11.419	0	16.6144	7.13627
	Zoo2_Sample2	14.9285	0	0	0	7.7285	19.6339	0
	Zoo2_Sample1	27.607	0	0	6.59215	6.61755	20.4496	0
	Zoo1_Sample4	0	6.54741	26.1966	0	30.2075	17.2385	0
	Zoo1_Sample3	0	17.9434	20.7174	8.1387	29.3743	0	0
	Zoo1_Sample2	15.4706	7.67629	17.8165	6.68379	7.61383	18.7118	0
	Zoo1_Sample1	0	0	7.7141	0	5.05557	12.8423	31.3503
	Mean	12.9174	3.23928	7.72736	6.71019	10.8523	18.8919	6.82192
	SD	12.4829	6.12061	9.38152	6.52257	10.2379	12.5536	11.6614
	CV	0.966363	1.8895	1.21406	0.972041	0.943385	0.664496	1.7094
	Zoo6_Sample1	12.1653	0	0	17.4962	9.33032	25.2985	24.3404
	Zoo5_Sample4	25.2996	0	7.30973	11.2491	7.14559	18.0555	0
	Zoo5_Sample3	25.0134	0	0	15.0038	5.47739	16.8618	12.1684
	Zoo5_Sample2	24.6463	0	5.98553	0	5.37915	29.1452	5.1053
	Zoo5_Sample1	18.314	0	0	0	0	20.9645	41.9998
	Zoo4_Sample11	19.923	14.3371	6.7217	9.13605	9.60154	21.6423	0
	Zoo4_Sample10	0	29.0476	5.17763	11.6704	12.9781	9.08541	0
	Zoo4_Sample9	17.7877	6.93893	0	7.70347	8.6906	35.256	0
	Zoo4_Sample7	9.76812	7.13338	0	7.4177	0	23.6115	0
	Zoo4_Sample6	18.8289	0	0	9.79882	9.39723	39.681	0
	Zoo4_Sample5	8.8174	0	0	0	0	39.9643	0
	Zoo4_Sample4	0	20.2945	5.50519	10.7928	22.6735	0	0
	Zoo4_Sample3	0	17.1107	19.4871	16.0417	16.6067	6.76342	0
	Zoo4_Sample1	7.71672	6.06041	14.6338	0	11.4608	34.7823	0
	Zoo3_Sample3	0	0	18.7073	0	27.6132	0	6.96841
	Zoo3_Sample2	0	0	14.3474	12.8338	31.5952	0	6.16134
	Zoo2_Sample6	6.2419	0	6.63591	15.9676	19.4982	18.7361	8.92218
	Zoo2_Sample5	42.9598	0	0	20.3384	0	13.5856	0
	Zoo2_Sample4	0	0	28.5806	5.34121	12.7496	20.6715	0
	Zoo2_Sample3	30.1816	0	0	11.419	0	16.6144	7.13627
	Zoo2_Sample1	27.607	0	0	6.59215	6.61755	20.4496	0
	Zoo1_Sample4	0	6.54741	26.1966	0	30.2075	17.2385	0
	Zoo1_Sample3	0	17.9434	20.7174	8.1387	29.3743	0	0
	Zoo1_Sample2	15.4706	7.67629	17.8165	6.68379	7.61383	18.7118	0
	Zoo1_Sample1	0	0	7.7141	0	5.05557	12.8423	31.3503
	Mean	12.4296	5.32359	8.22146	8.14499	11.5626	18.3985	5.7661
	SD	12.2332	8.17763	9.13953	6.29065	10.0135	11.77	10.991
	CV	0.984199	1.53611	1.11167	0.772333	0.866026	0.639726	1.90615

## Sheet: bear_random
n=3	Sample	Firmicutes_Erysipelotrichaceae	Firmicutes_Clostridiaceae	Firmicutes_Lachnospiraceae	Firmicutes_Peptostreptococcaceae	Fusobacteria_Fusobacteriaceae	Proteobacteria_Enterobacteriaceae
	Zoo4_Sample6	44.0366	19.6419	0	11.9054	0	5.86467
	Zoo4_Sample4	16.7712	28.9012	0	34.8866	0	0
	Zoo1_Sample7	0	19.0978	4.20087	0	43.9023	13.6948
	Mean	20.2692	22.547	1.40029	15.5973	14.6341	6.51983
	SD	22.2257	5.50962	2.42537	17.7339	25.347	6.87088
	CV	1.09652	0.244362	1.73205	1.13698	1.73205	1.05384
	Zoo3_Sample4	8.21848	10.8824	0	15.5814	0	0
	Zoo3_Sample2	3.01401	0	0	2.64169	0	0
	Zoo1_Sample4	6.19889	22.0712	0	22.6442	2.28682	42.5379
	Mean	5.81046	10.9845	0	13.6224	0.762272	14.1793
	SD	2.62389	11.0359	0	10.1441	1.32029	24.5593
	CV	0.451581	1.00468	#DIV/0!	0.744664	1.73205	1.73205
	Zoo4_Sample4	16.7712	28.9012	0	34.8866	0	0
	Zoo4_Sample11	16.6135	21.465	0	24.9175	0	26.0356
	Zoo1_Sample5	0	24.4976	0	5.5823	34.4068	9.38818
	Mean	11.1282	24.9546	0	21.7955	11.4689	11.8079
	SD	9.63764	3.73908	0	14.8995	19.8648	13.1854
	CV	0.866054	0.149836	#DIV/0!	0.683607	1.73205	1.11666
n=6	Zoo4_Sample4	16.7712	28.9012	0	34.8866	0	0
	Zoo1_Sample4	6.19889	22.0712	0	22.6442	2.28682	42.5379
	Zoo4_Sample3	3.90531	62.4533	0	30.9323	0	0
	Zoo4_Sample9	33.0014	22.9739	0	36.7216	0	2.18636
	Zoo3_Sample4	8.21848	10.8824	0	15.5814	0	0
	Zoo4_Sample3	3.90531	62.4533	0	30.9323	0	0
	Mean	12.0001	34.9559	0	28.6164	0.381136	7.45404
	SD	11.3386	22.0816	0	8.01645	0.933589	17.2097
	CV	0.944879	0.6317	#DIV/0!	0.280135	2.44949	2.30878
	Zoo4_Sample11	16.6135	21.465	0	24.9175	0	26.0356
	Zoo4_Sample4	16.7712	28.9012	0	34.8866	0	0
	Zoo4_Sample8	21.3341	30.314	0	19.1223	0	8.9448
	Zoo2_Sample2	15.4174	44.1851	12.4263	16.4051	0	6.84642
	Zoo2_Sample5	9.52062	10.3052	12.5921	7.45383	0	47.4596
	Zoo4_Sample2	9.36183	12.2963	0	23.9833	0	9.78322
	Mean	14.8364	24.5778	4.16974	21.1281	0	16.5116
	SD	4.64085	12.6513	6.45994	9.22089	0	17.4187
	CV	0.312801	0.514744	1.54924	0.436427	#DIV/0!	1.05494
	Zoo1_Sample6	0	25.607	4.60458	2.39334	42.7419	16.7187
	Zoo3_Sample6	16.9684	29.0957	0	32.0623	0	0
	Zoo3_Sample7	5.38478	4.0795	0	0	0	0
	Zoo1_Sample5	0	24.4976	0	5.5823	34.4068	9.38818
	Zoo4_Sample2	9.36183	12.2963	0	23.9833	0	9.78322
	Zoo4_Sample5	5.94924	31.9799	0	38.131	0	5.64789
	Mean	6.27737	21.2593	0.76743	17.0254	12.8581	6.923
	SD	6.38007	10.7816	1.87981	16.4613	20.0933	6.44508
	CV	1.01636	0.507145	2.44949	0.966869	1.5627	0.930967
n= 10	Zoo2_Sample3	15.9168	29.8879	26.4964	9.87704	0	12.8361
	Zoo3_Sample7	5.38478	4.0795	0	0	0	0
	Zoo3_Sample2	3.01401	0	0	2.64169	0	0
	Zoo3_Sample6	16.9684	29.0957	0	32.0623	0	0
	Zoo4_Sample3	3.90531	62.4533	0	30.9323	0	0
	Zoo2_Sample1	0	20.8482	12.0761	8.25973	0	29.5934
	Zoo3_Sample4	8.21848	10.8824	0	15.5814	0	0
	Zoo3_Sample5	15.0288	14.5705	0	13.7838	0	0
	Zoo3_Sample3	8.03923	30.1865	0	19.5332	0	0
	Zoo4_Sample7	0	53.3885	0	29.9165	0	0
	Mean	7.64758	25.5393	3.85725	16.2588	0	4.24295
	SD	6.39257	20.1696	8.81355	11.659	0	9.77815
	CV	0.835895	0.789747	2.28493	0.717088	#DIV/0!	2.30456
	Zoo4_Sample6	44.0366	19.6419	0	11.9054	0	5.86467
	Zoo2_Sample1	0	20.8482	12.0761	8.25973	0	29.5934
	Zoo2_Sample3	15.9168	29.8879	26.4964	9.87704	0	12.8361
	Zoo1_Sample6	0	25.607	4.60458	2.39334	42.7419	16.7187
	Zoo4_Sample5	5.94924	31.9799	0	38.131	0	5.64789
	Zoo1_Sample4	6.19889	22.0712	0	22.6442	2.28682	42.5379
	Zoo4_Sample7	0	53.3885	0	29.9165	0	0
	Zoo2_Sample4	3.60681	12.9463	4.05573	3.93705	0	64.7575
	Zoo4_Sample1	2.1856	2.59564	0	4.85474	0	0
	Zoo2_Sample5	9.52062	10.3052	12.5921	7.45383	0	47.4596
	Mean	8.74145	22.9272	5.98249	13.9373	4.50288	22.5416
	SD	13.3778	13.9588	8.73182	12.1433	13.455	22.5106
	CV	1.53038	0.608831	1.45956	0.871278	2.9881	0.998625
	Zoo4_Sample7	0	53.3885	0	29.9165	0	0
	Zoo3_Sample2	3.01401	0	0	2.64169	0	0
	Zoo4_Sample4	16.7712	28.9012	0	34.8866	0	0
	Zoo4_Sample5	5.94924	31.9799	0	38.131	0	5.64789
	Zoo4_Sample10	19.0495	53.8536	0	23.5786	0	3.0518
	Zoo2_Sample3	15.9168	29.8879	26.4964	9.87704	0	12.8361
	Zoo2_Sample2	15.4174	44.1851	12.4263	16.4051	0	6.84642
	Zoo3_Sample5	15.0288	14.5705	0	13.7838	0	0
	Zoo4_Sample11	16.6135	21.465	0	24.9175	0	26.0356
	Zoo3_Sample1	12.6388	36.7879	0	8.05945	0	0
	Mean	12.0399	31.502	3.89227	20.2197	0	5.44178
	SD	6.59704	16.855	8.85046	11.9402	0	8.39692
	CV	0.547931	0.535045	2.27385	0.590522	#DIV/0!	1.54305
n= 15	Zoo4_Sample11	16.6135	21.465	0	24.9175	0	26.0356
	Zoo2_Sample6	7.05796	22.6663	0	7.13809	0	51.6827
	Zoo4_Sample9	33.0014	22.9739	0	36.7216	0	2.18636
	Zoo3_Sample1	12.6388	36.7879	0	8.05945	0	0
	Zoo1_Sample5	0	24.4976	0	5.5823	34.4068	9.38818
	Zoo2_Sample5	9.52062	10.3052	12.5921	7.45383	0	47.4596
	Zoo3_Sample6	16.9684	29.0957	0	32.0623	0	0
	Zoo4_Sample2	9.36183	12.2963	0	23.9833	0	9.78322
	Zoo3_Sample4	8.21848	10.8824	0	15.5814	0	0
	Zoo2_Sample1	0	20.8482	12.0761	8.25973	0	29.5934
	Zoo4_Sample3	3.90531	62.4533	0	30.9323	0	0
	Zoo3_Sample3	8.03923	30.1865	0	19.5332	0	0
	Zoo4_Sample7	0	53.3885	0	29.9165	0	0
	Zoo4_Sample1	2.1856	2.59564	0	4.85474	0	0
	Zoo2_Sample4	3.60681	12.9463	4.05573	3.93705	0	64.7575
	Mean	8.74119	24.8926	1.91493	17.2622	2.29379	16.0591
	SD	8.70118	16.1567	4.35756	11.6154	8.88379	22.3461
	CV	0.995423	0.649055	2.27558	0.672878	3.87298	1.39149
	Zoo3_Sample7	5.38478	4.0795	0	0	0	0
	Zoo2_Sample3	15.9168	29.8879	26.4964	9.87704	0	12.8361
	Zoo2_Sample4	3.60681	12.9463	4.05573	3.93705	0	64.7575
	Zoo4_Sample7	0	53.3885	0	29.9165	0	0
	Zoo4_Sample8	21.3341	30.314	0	19.1223	0	8.9448
	Zoo2_Sample6	7.05796	22.6663	0	7.13809	0	51.6827
	Zoo4_Sample1	2.1856	2.59564	0	4.85474	0	0
	Zoo2_Sample1	0	20.8482	12.0761	8.25973	0	29.5934
	Zoo1_Sample4	6.19889	22.0712	0	22.6442	2.28682	42.5379
	Zoo3_Sample5	15.0288	14.5705	0	13.7838	0	0
	Zoo4_Sample11	16.6135	21.465	0	24.9175	0	26.0356
	Zoo3_Sample4	8.21848	10.8824	0	15.5814	0	0
	Zoo2_Sample5	9.52062	10.3052	12.5921	7.45383	0	47.4596
	Zoo4_Sample6	44.0366	19.6419	0	11.9054	0	5.86467
	Zoo4_Sample3	3.90531	62.4533	0	30.9323	0	0
	Mean	10.6005	22.5411	3.68135	14.0216	0.152454	19.3142
	SD	11.2519	16.5863	7.6514	9.59131	0.590453	22.6207
	CV	1.06144	0.735827	2.07842	0.684039	3.87298	1.1712
	Zoo1_Sample4	6.19889	22.0712	0	22.6442	2.28682	42.5379
	Zoo1_Sample5	0	24.4976	0	5.5823	34.4068	9.38818
	Zoo1_Sample6	0	25.607	4.60458	2.39334	42.7419	16.7187
	Zoo1_Sample7	0	19.0978	4.20087	0	43.9023	13.6948
	Zoo2_Sample1	0	20.8482	12.0761	8.25973	0	29.5934
	Zoo2_Sample2	15.4174	44.1851	12.4263	16.4051	0	6.84642
	Zoo2_Sample3	15.9168	29.8879	26.4964	9.87704	0	12.8361
	Zoo2_Sample5	9.52062	10.3052	12.5921	7.45383	0	47.4596
	Zoo2_Sample6	7.05796	22.6663	0	7.13809	0	51.6827
	Zoo3_Sample1	12.6388	36.7879	0	8.05945	0	0
	Zoo3_Sample2	3.01401	0	0	2.64169	0	0
	Zoo3_Sample5	15.0288	14.5705	0	13.7838	0	0
	Zoo4_Sample10	19.0495	53.8536	0	23.5786	0	3.0518
	Zoo4_Sample11	16.6135	21.465	0	24.9175	0	26.0356
	Zoo4_Sample9	33.0014	22.9739	0	36.7216	0	2.18636
	Mean	10.2305	24.5878	4.82642	12.6304	8.22252	17.4688
	SD	9.34514	13.0765	7.79331	10.3005	16.7528	17.9088
	CV	0.913459	0.531829	1.61472	0.815528	2.03743	1.02519
n=20	Zoo4_Sample11	16.6135	21.465	0	24.9175	0	26.0356
	Zoo4_Sample10	19.0495	53.8536	0	23.5786	0	3.0518
	Zoo4_Sample9	33.0014	22.9739	0	36.7216	0	2.18636
	Zoo4_Sample6	44.0366	19.6419	0	11.9054	0	5.86467
	Zoo4_Sample5	5.94924	31.9799	0	38.131	0	5.64789
	Zoo4_Sample3	3.90531	62.4533	0	30.9323	0	0
	Zoo4_Sample2	9.36183	12.2963	0	23.9833	0	9.78322
	Zoo4_Sample1	2.1856	2.59564	0	4.85474	0	0
	Zoo3_Sample7	5.38478	4.0795	0	0	0	0
	Zoo3_Sample5	15.0288	14.5705	0	13.7838	0	0
	Zoo3_Sample3	8.03923	30.1865	0	19.5332	0	0
	Zoo3_Sample2	3.01401	0	0	2.64169	0	0
	Zoo3_Sample1	12.6388	36.7879	0	8.05945	0	0
	Zoo2_Sample6	7.05796	22.6663	0	7.13809	0	51.6827
	Zoo2_Sample4	3.60681	12.9463	4.05573	3.93705	0	64.7575
	Zoo2_Sample3	15.9168	29.8879	26.4964	9.87704	0	12.8361
	Zoo2_Sample2	15.4174	44.1851	12.4263	16.4051	0	6.84642
	Zoo1_Sample7	0	19.0978	4.20087	0	43.9023	13.6948
	Zoo1_Sample6	0	25.607	4.60458	2.39334	42.7419	16.7187
	Zoo1_Sample5	0	24.4976	0	5.5823	34.4068	9.38818
	Mean	11.0104	24.5886	2.5892	14.2188	6.05255	11.4247
	SD	11.3041	16.0668	6.39775	12.0233	14.8775	17.5843
	CV	1.02668	0.653426	2.47094	0.845592	2.45805	1.53915
	Zoo4_Sample11	16.6135	21.465	0	24.9175	0	26.0356
	Zoo4_Sample10	19.0495	53.8536	0	23.5786	0	3.0518
	Zoo4_Sample9	33.0014	22.9739	0	36.7216	0	2.18636
	Zoo4_Sample7	0	53.3885	0	29.9165	0	0
	Zoo4_Sample6	44.0366	19.6419	0	11.9054	0	5.86467
	Zoo4_Sample5	5.94924	31.9799	0	38.131	0	5.64789
	Zoo4_Sample3	3.90531	62.4533	0	30.9323	0	0
	Zoo4_Sample1	2.1856	2.59564	0	4.85474	0	0
	Zoo3_Sample7	5.38478	4.0795	0	0	0	0
	Zoo3_Sample5	15.0288	14.5705	0	13.7838	0	0
	Zoo3_Sample3	8.03923	30.1865	0	19.5332	0	0
	Zoo3_Sample2	3.01401	0	0	2.64169	0	0
	Zoo2_Sample6	7.05796	22.6663	0	7.13809	0	51.6827
	Zoo2_Sample5	9.52062	10.3052	12.5921	7.45383	0	47.4596
	Zoo2_Sample3	15.9168	29.8879	26.4964	9.87704	0	12.8361
	Zoo2_Sample1	0	20.8482	12.0761	8.25973	0	29.5934
	Zoo1_Sample7	0	19.0978	4.20087	0	43.9023	13.6948
	Zoo1_Sample6	0	25.607	4.60458	2.39334	42.7419	16.7187
	Zoo1_Sample5	0	24.4976	0	5.5823	34.4068	9.38818
	Zoo1_Sample4	6.19889	22.0712	0	22.6442	2.28682	42.5379
	Mean	9.74511	24.6085	2.9985	15.0132	6.16689	13.3349
	SD	11.6621	16.4461	6.7492	12.3308	14.8372	17.0612
	CV	1.19671	0.66831	2.25086	0.821326	2.40595	1.27944
	Zoo4_Sample11	16.6135	21.465	0	24.9175	0	26.0356
	Zoo4_Sample10	19.0495	53.8536	0	23.5786	0	3.0518
	Zoo4_Sample9	33.0014	22.9739	0	36.7216	0	2.18636
	Zoo4_Sample8	21.3341	30.314	0	19.1223	0	8.9448
	Zoo4_Sample7	0	53.3885	0	29.9165	0	0
	Zoo4_Sample6	44.0366	19.6419	0	11.9054	0	5.86467
	Zoo4_Sample5	5.94924	31.9799	0	38.131	0	5.64789
	Zoo4_Sample4	16.7712	28.9012	0	34.8866	0	0
	Zoo4_Sample3	3.90531	62.4533	0	30.9323	0	0
	Zoo4_Sample1	2.1856	2.59564	0	4.85474	0	0
	Zoo3_Sample7	5.38478	4.0795	0	0	0	0
	Zoo3_Sample6	16.9684	29.0957	0	32.0623	0	0
	Zoo3_Sample4	8.21848	10.8824	0	15.5814	0	0
	Zoo3_Sample2	3.01401	0	0	2.64169	0	0
	Zoo2_Sample6	7.05796	22.6663	0	7.13809	0	51.6827
	Zoo2_Sample5	9.52062	10.3052	12.5921	7.45383	0	47.4596
	Zoo2_Sample2	15.4174	44.1851	12.4263	16.4051	0	6.84642
	Zoo2_Sample1	0	20.8482	12.0761	8.25973	0	29.5934
	Zoo1_Sample7	0	19.0978	4.20087	0	43.9023	13.6948
	Zoo1_Sample5	0	24.4976	0	5.5823	34.4068	9.38818
	Mean	11.4214	25.6612	2.06477	17.5046	3.91545	10.5198
	SD	11.7468	17.1563	4.53749	12.9853	12.1496	15.806
	CV	1.02849	0.668567	2.19758	0.741822	3.10298	1.5025
n=25	Zoo4_Sample11	16.6135	21.465	0	24.9175	0	26.0356
	Zoo4_Sample10	19.0495	53.8536	0	23.5786	0	3.0518
	Zoo4_Sample9	33.0014	22.9739	0	36.7216	0	2.18636
	Zoo4_Sample8	21.3341	30.314	0	19.1223	0	8.9448
	Zoo4_Sample7	0	53.3885	0	29.9165	0	0
	Zoo4_Sample6	44.0366	19.6419	0	11.9054	0	5.86467
	Zoo4_Sample4	16.7712	28.9012	0	34.8866	0	0
	Zoo4_Sample3	3.90531	62.4533	0	30.9323	0	0
	Zoo4_Sample2	9.36183	12.2963	0	23.9833	0	9.78322
	Zoo4_Sample1	2.1856	2.59564	0	4.85474	0	0
	Zoo3_Sample7	5.38478	4.0795	0	0	0	0
	Zoo3_Sample6	16.9684	29.0957	0	32.0623	0	0
	Zoo3_Sample5	15.0288	14.5705	0	13.7838	0	0
	Zoo3_Sample3	8.03923	30.1865	0	19.5332	0	0
	Zoo3_Sample2	3.01401	0	0	2.64169	0	0
	Zoo3_Sample1	12.6388	36.7879	0	8.05945	0	0
	Zoo2_Sample6	7.05796	22.6663	0	7.13809	0	51.6827
	Zoo2_Sample5	9.52062	10.3052	12.5921	7.45383	0	47.4596
	Zoo2_Sample4	3.60681	12.9463	4.05573	3.93705	0	64.7575
	Zoo2_Sample3	15.9168	29.8879	26.4964	9.87704	0	12.8361
	Zoo2_Sample2	15.4174	44.1851	12.4263	16.4051	0	6.84642
	Zoo2_Sample1	0	20.8482	12.0761	8.25973	0	29.5934
	Zoo1_Sample6	0	25.607	4.60458	2.39334	42.7419	16.7187
	Zoo1_Sample5	0	24.4976	0	5.5823	34.4068	9.38818
	Zoo1_Sample4	6.19889	22.0712	0	22.6442	2.28682	42.5379
	Mean	11.4021	25.4247	2.89005	16.0236	3.17742	13.5075
	SD	10.6464	15.7161	6.42167	11.2907	10.7307	19.0639
	CV	0.933725	0.618144	2.22199	0.704627	3.37716	1.41136
	Zoo4_Sample11	16.6135	21.465	0	24.9175	0	26.0356
	Zoo4_Sample10	19.0495	53.8536	0	23.5786	0	3.0518
	Zoo4_Sample9	33.0014	22.9739	0	36.7216	0	2.18636
	Zoo4_Sample8	21.3341	30.314	0	19.1223	0	8.9448
	Zoo4_Sample7	0	53.3885	0	29.9165	0	0
	Zoo4_Sample6	44.0366	19.6419	0	11.9054	0	5.86467
	Zoo4_Sample4	16.7712	28.9012	0	34.8866	0	0
	Zoo4_Sample3	3.90531	62.4533	0	30.9323	0	0
	Zoo4_Sample2	9.36183	12.2963	0	23.9833	0	9.78322
	Zoo4_Sample1	2.1856	2.59564	0	4.85474	0	0
	Zoo3_Sample7	5.38478	4.0795	0	0	0	0
	Zoo3_Sample6	16.9684	29.0957	0	32.0623	0	0
	Zoo3_Sample5	15.0288	14.5705	0	13.7838	0	0
	Zoo3_Sample3	8.03923	30.1865	0	19.5332	0	0
	Zoo3_Sample2	3.01401	0	0	2.64169	0	0
	Zoo3_Sample1	12.6388	36.7879	0	8.05945	0	0
	Zoo2_Sample5	9.52062	10.3052	12.5921	7.45383	0	47.4596
	Zoo2_Sample4	3.60681	12.9463	4.05573	3.93705	0	64.7575
	Zoo2_Sample3	15.9168	29.8879	26.4964	9.87704	0	12.8361
	Zoo2_Sample2	15.4174	44.1851	12.4263	16.4051	0	6.84642
	Zoo2_Sample1	0	20.8482	12.0761	8.25973	0	29.5934
	Zoo1_Sample7	0	19.0978	4.20087	0	43.9023	13.6948
	Zoo1_Sample6	0	25.607	4.60458	2.39334	42.7419	16.7187
	Zoo1_Sample5	0	24.4976	0	5.5823	34.4068	9.38818
	Zoo1_Sample4	6.19889	22.0712	0	22.6442	2.28682	42.5379
	Mean	11.1197	25.282	3.05808	15.7381	4.93351	11.988
	SD	10.8579	15.7584	6.39781	11.6105	13.4394	17.3293
	CV	0.976449	0.623305	2.0921	0.73773	2.72411	1.44556
	Zoo4_Sample11	16.6135	21.465	0	24.9175	0	26.0356
	Zoo4_Sample10	19.0495	53.8536	0	23.5786	0	3.0518
	Zoo4_Sample9	33.0014	22.9739	0	36.7216	0	2.18636
	Zoo4_Sample8	21.3341	30.314	0	19.1223	0	8.9448
	Zoo4_Sample7	0	53.3885	0	29.9165	0	0
	Zoo4_Sample6	44.0366	19.6419	0	11.9054	0	5.86467
	Zoo4_Sample5	5.94924	31.9799	0	38.131	0	5.64789
	Zoo4_Sample4	16.7712	28.9012	0	34.8866	0	0
	Zoo4_Sample3	3.90531	62.4533	0	30.9323	0	0
	Zoo4_Sample2	9.36183	12.2963	0	23.9833	0	9.78322
	Zoo4_Sample1	2.1856	2.59564	0	4.85474	0	0
	Zoo3_Sample7	5.38478	4.0795	0	0	0	0
	Zoo3_Sample6	16.9684	29.0957	0	32.0623	0	0
	Zoo3_Sample5	15.0288	14.5705	0	13.7838	0	0
	Zoo3_Sample4	8.21848	10.8824	0	15.5814	0	0
	Zoo3_Sample2	3.01401	0	0	2.64169	0	0
	Zoo3_Sample1	12.6388	36.7879	0	8.05945	0	0
	Zoo2_Sample5	9.52062	10.3052	12.5921	7.45383	0	47.4596
	Zoo2_Sample4	3.60681	12.9463	4.05573	3.93705	0	64.7575
	Zoo2_Sample3	15.9168	29.8879	26.4964	9.87704	0	12.8361
	Zoo2_Sample2	15.4174	44.1851	12.4263	16.4051	0	6.84642
	Zoo2_Sample1	0	20.8482	12.0761	8.25973	0	29.5934
	Zoo1_Sample6	0	25.607	4.60458	2.39334	42.7419	16.7187
	Zoo1_Sample5	0	24.4976	0	5.5823	34.4068	9.38818
	Zoo1_Sample4	6.19889	22.0712	0	22.6442	2.28682	42.5379
	Mean	11.3649	25.0251	2.89005	17.1052	3.17742	11.6661
	SD	10.6653	16.0053	6.42167	11.9511	10.7307	17.371
	CV	0.93844	0.639571	2.22199	0.698683	3.37716	1.48901

## Sheet: tiger_random
n=3	Sample	Bacteroidetes_Bacteroidaceae	Firmicutes_Erysipelotrichaceae	Firmicutes_Clostridiaceae	Firmicutes_Lachnospiraceae	Firmicutes_Peptostreptococcaceae	Fusobacteria_Fusobacteriaceae	Proteobacteria_Enterobacteriaceae
	Zoo3_Sample11	20.9976	0	13.4318	17.8446	9.44508	16.3519	5.04622
	Zoo4_Sample1	46.7605	0	0	5.99549	2.01461	25.9966	12.8935
	Zoo2_Sample4	26.2541	0	10.9324	7.53135	14.1767	17.5504	7.66767
	Mean	31.3374	0	8.12138	10.4571	8.54545	19.9663	8.5358
	SD	13.6129	0	7.14348	6.44364	6.13073	5.25663	3.99503
	CV	0.434399	#DIV/0!	0.87959	0.616195	0.717426	0.263275	0.468032
	Zoo1_Sample10	14.0985	0	2.82118	20.7701	9.3595	27.0196	0
	Zoo1_Sample16	8.40676	2.01044	6.42199	15.3763	15.3535	22.035	0
	Zoo1_Sample11	10.5514	0	9.28603	4.80362	4.351	27.1086	0
	Mean	11.0189	0.670146	6.1764	13.65	9.68799	25.3877	0
	SD	2.87451	1.16073	3.23941	8.12201	5.50858	2.90392	0
	CV	0.260871	1.73205	0.524483	0.595019	0.568599	0.114383	#DIV/0!
	Zoo3_Sample1	36.5683	0	4.28251	4.1156	9.32329	32.4288	0
	Zoo7_Sample1	22.3407	0	17.1505	2.7623	10.6518	36.4914	0
	Zoo5_Sample2	33.0951	0	5.4746	6.24543	2.44753	19.6084	0
	Mean	29.4545	0	10.7165	3.43895	9.98755	34.4601	0
	SD	10.0604	0	9.09902	0.956929	0.939404	2.87267	0
	CV	0.341558	#DIV/0!	0.849067	0.278262	0.0940576	0.0833623	#DIV/0!
n=6	Zoo1_Sample10	14.0985	0	2.82118	20.7701	9.3595	27.0196	0
	Zoo7_Sample1	22.3407	0	17.1505	2.7623	10.6518	36.4914	0
	Zoo4_Sample1	46.7605	0	0	5.99549	2.01461	25.9966	12.8935
	Zoo8_Sample2	28.1024	0	4.55819	8.24485	3.38844	23.0943	2.83569
	Zoo6_Sample1	0	0	12.8481	10.3593	19.59	39.8502	4.88394
	Zoo5_Sample2	33.0951	0	5.4746	6.24543	2.44753	19.6084	0
	Mean	24.0662	0	7.14208	9.0629	7.90864	28.6767	3.43553
	SD	16.0895	0	6.50942	6.26822	6.79822	7.86438	5.04618
	CV	0.668551	#DIV/0!	0.911417	0.691635	0.859594	0.274242	1.46882
	Zoo2_Sample3	18.4471	0	0	0	0	39.9004	6.33449
	Zoo3_Sample4	0	0	9.31375	3.32674	6.57159	12.9286	49.7289
	Zoo4_Sample7	0	0	3.30566	0	2.74395	0	87.9405
	Zoo1_Sample20	5.30106	0	34.4342	3.75032	10.3621	11.9193	0
	Zoo2_Sample5	4.92072	0	45.9763	0	18.9012	9.63299	14.7026
	Zoo3_Sample3	19.8834	0	41.3493	4.58942	5.56882	17.2326	0
	Mean	8.09206	0	22.3965	1.94441	7.35794	15.269	26.4511
	SD	8.88903	0	20.4809	2.16843	6.65612	13.3579	35.3973
	CV	1.09849	#DIV/0!	0.914469	1.11521	0.904617	0.87484	1.33822
	Zoo1_Sample12	8.74408	0	0	0	4.56862	34.8926	0
	Zoo3_Sample10	17.9002	0	13.1193	11.8022	7.23693	28.7228	17.7924
	Zoo1_Sample9	8.63931	0	4.36285	2.11663	2.4622	25.1404	0
	Zoo4_Sample3	8.14177	0	19.4756	17.4329	28.9327	6.45114	3.84101
	Zoo1_Sample8	0	0	30.3455	0	11.3498	15.7685	38.4409
	Zoo1_Sample17	18.1025	0	0	13.6971	7.03163	35.6649	2.7076
	Mean	10.2546	0	11.2172	7.50814	10.2636	24.44	10.4636
	SD	6.84916	0	12.1355	7.70786	9.61889	11.427	15.2278
	CV	0.667909	#DIV/0!	1.08186	1.0266	0.937181	0.467552	1.4553
n= 10	Zoo3_Sample3	19.8834	0	41.3493	4.58942	5.56882	17.2326	0
	Zoo2_Sample2	20.8796	0	6.78907	2.8608	2.65585	52.8693	0
	Zoo3_Sample1	36.5683	0	4.28251	4.1156	9.32329	32.4288	0
	Zoo1_Sample18	0	0	34.6007	7.94056	19.1853	0	19.3797
	Zoo4_Sample6	17.9576	0	29.0042	21.0366	12.4116	5.75911	3.80011
	Zoo1_Sample8	0	0	30.3455	0	11.3498	15.7685	38.4409
	Zoo1_Sample7	0	0	14.4518	0	9.11527	27.3056	4.54591
	Zoo1_Sample2	5.38357	0	7.38396	0	2.31501	24.3542	5.06506
	Zoo4_Sample4	10.1307	0	6.69409	15.0629	10.0194	31.7377	21.6844
	Zoo1_Sample3	11.5101	0	16.7594	20.2275	8.75241	14.2047	0
	Mean	12.2313	0	19.1661	7.58334	9.06967	22.1661	9.2916
	SD	11.8278	0	13.5367	8.25126	4.93041	15.1291	12.9996
	CV	0.967007	#DIV/0!	0.706287	1.08808	0.543615	0.682534	1.39907
	Zoo3_Sample11	20.9976	0	13.4318	17.8446	9.44508	16.3519	5.04622
	Zoo7_Sample1	22.3407	0	17.1505	2.7623	10.6518	36.4914	0
	Zoo1_Sample18	0	0	34.6007	7.94056	19.1853	0	19.3797
	Zoo3_Sample7	5.83821	0	19.3415	11.9475	10.207	25.0108	18.6933
	Zoo1_Sample17	18.1025	0	0	13.6971	7.03163	35.6649	2.7076
	Zoo4_Sample5	12.8553	0	23.3883	13.1292	10.9164	18.749	14.6848
	Zoo4_Sample2	4.68637	0	17.4117	15.2848	30.918	16.6787	12.6412
	Zoo1_Sample4	18.1648	0	16.8101	11.3828	8.2815	29.4965	0
	Zoo6_Sample1	0	0	12.8481	10.3593	19.59	39.8502	4.88394
	Zoo3_Sample8	23.402	0	14.9083	6.34679	13.5504	16.955	18.0122
	Mean	12.6387	0	16.9891	11.0695	13.9777	23.5248	9.60489
	SD	9.24509	0	8.69005	4.4384	7.31562	12.1911	7.88107
	CV	0.731488	#DIV/0!	0.511507	0.400958	0.523378	0.518223	0.820527
	Zoo1_Sample7	0	0	14.4518	0	9.11527	27.3056	4.54591
	Zoo1_Sample2	5.38357	0	7.38396	0	2.31501	24.3542	5.06506
	Zoo3_Sample9	7.132	3.566	10.5986	28.5923	13.7028	12.1829	9.27745
	Zoo1_Sample1	10.8954	0	15.5891	6.40258	7.43424	28.2052	0
	Zoo1_Sample16	8.40676	2.01044	6.42199	15.3763	15.3535	22.035	0
	Zoo7_Sample1	22.3407	0	17.1505	2.7623	10.6518	36.4914	0
	Zoo6_Sample1	0	0	12.8481	10.3593	19.59	39.8502	4.88394
	Zoo3_Sample1	36.5683	0	4.28251	4.1156	9.32329	32.4288	0
	Zoo4_Sample1	46.7605	0	0	5.99549	2.01461	25.9966	12.8935
	Zoo8_Sample2	28.1024	0	4.55819	8.24485	3.38844	23.0943	2.83569
	Mean	16.559	0.557644	9.32847	8.18487	9.28889	27.1944	3.95016
	SD	16.1241	1.23146	5.65778	8.56886	5.81251	7.84088	4.40316
	CV	0.973738	2.20834	0.606507	1.04692	0.625749	0.288327	1.11468
n= 15	Zoo1_Sample14	0	0	11.5208	4.67791	10.0966	28.5054	0
	Zoo5_Sample2	33.0951	0	5.4746	6.24543	2.44753	19.6084	0
	Zoo1_Sample4	18.1648	0	16.8101	11.3828	8.2815	29.4965	0
	Zoo2_Sample5	4.92072	0	45.9763	0	18.9012	9.63299	14.7026
	Zoo4_Sample2	4.68637	0	17.4117	15.2848	30.918	16.6787	12.6412
	Zoo1_Sample17	18.1025	0	0	13.6971	7.03163	35.6649	2.7076
	Zoo6_Sample1	0	0	12.8481	10.3593	19.59	39.8502	4.88394
	Zoo1_Sample10	14.0985	0	2.82118	20.7701	9.3595	27.0196	0
	Zoo1_Sample6	9.85534	2.95059	15.0975	19.7955	11.9063	20.0662	7.67317
	Zoo2_Sample2	20.8796	0	6.78907	2.8608	2.65585	52.8693	0
	Zoo5_Sample1	18.0217	0	19.8477	9.06588	8.70802	23.4263	0
	Zoo1_Sample9	8.63931	0	4.36285	2.11663	2.4622	25.1404	0
	Zoo1_Sample19	14.5455	0	4.51594	18.9906	6.82999	33.1523	2.46163
	Zoo1_Sample18	0	0	34.6007	7.94056	19.1853	0	19.3797
	Zoo4_Sample3	8.14177	0	19.4756	17.4329	28.9327	6.45114	3.84101
	Mean	11.5434	0.196706	14.5035	10.708	12.4871	24.5041	4.55272
	SD	9.29477	0.761838	12.4325	6.78651	9.07951	13.4714	6.27639
	CV	0.805202	3.87298	0.857207	0.633779	0.727113	0.549758	1.3786
	Zoo5_Sample1	18.0217	0	19.8477	9.06588	8.70802	23.4263	0
	Zoo1_Sample9	8.63931	0	4.36285	2.11663	2.4622	25.1404	0
	Zoo8_Sample2	28.1024	0	4.55819	8.24485	3.38844	23.0943	2.83569
	Zoo1_Sample3	11.5101	0	16.7594	20.2275	8.75241	14.2047	0
	Zoo2_Sample2	20.8796	0	6.78907	2.8608	2.65585	52.8693	0
	Zoo1_Sample13	7.57555	0	16.5332	2.18633	8.28575	15.8648	0
	Zoo1_Sample10	14.0985	0	2.82118	20.7701	9.3595	27.0196	0
	Zoo3_Sample4	0	0	9.31375	3.32674	6.57159	12.9286	49.7289
	Zoo4_Sample5	12.8553	0	23.3883	13.1292	10.9164	18.749	14.6848
	Zoo1_Sample20	5.30106	0	34.4342	3.75032	10.3621	11.9193	0
	Zoo2_Sample1	24.6186	0	0	4.0742	2.32316	29.0049	0
	Zoo9_Sample2	2.01794	13.3184	33.7724	25.5886	12.5673	0	3.78924
	Zoo3_Sample10	17.9002	0	13.1193	11.8022	7.23693	28.7228	17.7924
	Zoo1_Sample12	8.74408	0	0	0	4.56862	34.8926	0
	Zoo1_Sample5	21.6834	0	8.60972	9.18335	4.86024	27.4979	4.15102
	Mean	13.4632	0.887892	12.954	9.08844	6.86789	23.0223	6.1988
	SD	8.30428	3.43879	11.1202	7.84525	3.33479	12.0805	13.2784
	CV	0.616814	3.87298	0.858444	0.863211	0.485563	0.524729	2.14209
	Zoo1_Sample11	10.5514	0	9.28603	4.80362	4.351	27.1086	0
	Zoo6_Sample1	0	0	12.8481	10.3593	19.59	39.8502	4.88394
	Zoo2_Sample4	26.2541	0	10.9324	7.53135	14.1767	17.5504	7.66767
	Zoo4_Sample6	17.9576	0	29.0042	21.0366	12.4116	5.75911	3.80011
	Zoo8_Sample2	28.1024	0	4.55819	8.24485	3.38844	23.0943	2.83569
	Zoo7_Sample1	22.3407	0	17.1505	2.7623	10.6518	36.4914	0
	Zoo1_Sample5	21.6834	0	8.60972	9.18335	4.86024	27.4979	4.15102
	Zoo3_Sample7	5.83821	0	19.3415	11.9475	10.207	25.0108	18.6933
	Zoo1_Sample13	7.57555	0	16.5332	2.18633	8.28575	15.8648	0
	Zoo4_Sample2	4.68637	0	17.4117	15.2848	30.918	16.6787	12.6412
	Zoo4_Sample5	12.8553	0	23.3883	13.1292	10.9164	18.749	14.6848
	Zoo1_Sample4	18.1648	0	16.8101	11.3828	8.2815	29.4965	0
	Zoo1_Sample1	10.8954	0	15.5891	6.40258	7.43424	28.2052	0
	Zoo8_Sample1	24.9046	0	10.9713	13.5139	5.27872	33.6182	2.08031
	Zoo2_Sample5	4.92072	0	45.9763	0	18.9012	9.63299	14.7026
	Mean	14.4487	0	17.2274	9.18457	11.3102	23.6405	5.74271
	SD	8.95404	0	10.0242	5.54823	7.29182	9.62721	6.39785
	CV	0.619712	#DIV/0!	0.581876	0.604081	0.644714	0.407233	1.11408
n=20	Zoo5_Sample2	33.0951	0	5.4746	6.24543	2.44753	19.6084	0
	Zoo4_Sample4	10.1307	0	6.69409	15.0629	10.0194	31.7377	21.6844
	Zoo4_Sample3	8.14177	0	19.4756	17.4329	28.9327	6.45114	3.84101
	Zoo1_Sample19	14.5455	0	4.51594	18.9906	6.82999	33.1523	2.46163
	Zoo9_Sample1	31.9451	0	13.8446	2.41747	0	32.4022	11.7826
	Zoo3_Sample6	30.5377	0	0	6.89921	0	41.7576	8.35999
	Zoo2_Sample1	24.6186	0	0	4.0742	2.32316	29.0049	0
	Zoo4_Sample6	17.9576	0	29.0042	21.0366	12.4116	5.75911	3.80011
	Zoo6_Sample1	0	0	12.8481	10.3593	19.59	39.8502	4.88394
	Zoo1_Sample11	10.5514	0	9.28603	4.80362	4.351	27.1086	0
	Zoo4_Sample5	12.8553	0	23.3883	13.1292	10.9164	18.749	14.6848
	Zoo3_Sample2	5.83869	0	19.6128	6.08838	14.3659	18.7474	17.4203
	Zoo3_Sample10	17.9002	0	13.1193	11.8022	7.23693	28.7228	17.7924
	Zoo2_Sample3	18.4471	0	0	0	0	39.9004	6.33449
	Zoo1_Sample17	18.1025	0	0	13.6971	7.03163	35.6649	2.7076
	Zoo2_Sample5	4.92072	0	45.9763	0	18.9012	9.63299	14.7026
	Zoo1_Sample5	21.6834	0	8.60972	9.18335	4.86024	27.4979	4.15102
	Zoo1_Sample18	0	0	34.6007	7.94056	19.1853	0	19.3797
	Zoo2_Sample4	26.2541	0	10.9324	7.53135	14.1767	17.5504	7.66767
	Zoo1_Sample9	8.63931	0	4.36285	2.11663	2.4622	25.1404	0
	Mean	15.8082	0	13.0873	8.94055	9.30208	24.4219	8.08271
	SD	10.044	0	12.483	6.15451	7.96389	12.087	7.19039
	CV	0.635364	#DIV/0!	0.953824	0.688382	0.856141	0.494925	0.889601
	Zoo1_Sample5	21.6834	0	8.60972	9.18335	4.86024	27.4979	4.15102
	Zoo3_Sample2	5.83869	0	19.6128	6.08838	14.3659	18.7474	17.4203
	Zoo3_Sample5	22.619	0	20.1983	5.54406	8.34015	32.9275	0
	Zoo1_Sample11	10.5514	0	9.28603	4.80362	4.351	27.1086	0
	Zoo3_Sample8	23.402	0	14.9083	6.34679	13.5504	16.955	18.0122
	Zoo1_Sample6	9.85534	2.95059	15.0975	19.7955	11.9063	20.0662	7.67317
	Zoo4_Sample4	10.1307	0	6.69409	15.0629	10.0194	31.7377	21.6844
	Zoo1_Sample19	14.5455	0	4.51594	18.9906	6.82999	33.1523	2.46163
	Zoo4_Sample2	4.68637	0	17.4117	15.2848	30.918	16.6787	12.6412
	Zoo5_Sample1	18.0217	0	19.8477	9.06588	8.70802	23.4263	0
	Zoo1_Sample10	14.0985	0	2.82118	20.7701	9.3595	27.0196	0
	Zoo1_Sample13	7.57555	0	16.5332	2.18633	8.28575	15.8648	0
	Zoo2_Sample1	24.6186	0	0	4.0742	2.32316	29.0049	0
	Zoo3_Sample10	17.9002	0	13.1193	11.8022	7.23693	28.7228	17.7924
	Zoo1_Sample20	5.30106	0	34.4342	3.75032	10.3621	11.9193	0
	Zoo1_Sample14	0	0	11.5208	4.67791	10.0966	28.5054	0
	Zoo5_Sample2	33.0951	0	5.4746	6.24543	2.44753	19.6084	0
	Zoo1_Sample17	18.1025	0	0	13.6971	7.03163	35.6649	2.7076
	Zoo7_Sample1	22.3407	0	17.1505	2.7623	10.6518	36.4914	0
	Zoo3_Sample11	20.9976	0	13.4318	17.8446	9.44508	16.3519	5.04622
	Mean	15.2682	0.147529	12.5334	9.89881	9.55447	24.8725	5.47951
	SD	8.41154	0.659771	8.27221	6.20553	5.97511	7.38211	7.57055
	CV	0.550919	4.47214	0.660014	0.626897	0.625374	0.296798	1.38161
	Zoo1_Sample12	8.74408	0	0	0	4.56862	34.8926	0
	Zoo2_Sample2	20.8796	0	6.78907	2.8608	2.65585	52.8693	0
	Zoo1_Sample11	10.5514	0	9.28603	4.80362	4.351	27.1086	0
	Zoo5_Sample2	33.0951	0	5.4746	6.24543	2.44753	19.6084	0
	Zoo7_Sample1	22.3407	0	17.1505	2.7623	10.6518	36.4914	0
	Zoo1_Sample7	0	0	14.4518	0	9.11527	27.3056	4.54591
	Zoo4_Sample7	0	0	3.30566	0	2.74395	0	87.9405
	Zoo1_Sample13	7.57555	0	16.5332	2.18633	8.28575	15.8648	0
	Zoo4_Sample6	17.9576	0	29.0042	21.0366	12.4116	5.75911	3.80011
	Zoo1_Sample19	14.5455	0	4.51594	18.9906	6.82999	33.1523	2.46163
	Zoo2_Sample4	26.2541	0	10.9324	7.53135	14.1767	17.5504	7.66767
	Zoo3_Sample11	20.9976	0	13.4318	17.8446	9.44508	16.3519	5.04622
	Zoo4_Sample3	8.14177	0	19.4756	17.4329	28.9327	6.45114	3.84101
	Zoo5_Sample1	18.0217	0	19.8477	9.06588	8.70802	23.4263	0
	Zoo3_Sample5	22.619	0	20.1983	5.54406	8.34015	32.9275	0
	Zoo1_Sample16	8.40676	2.01044	6.42199	15.3763	15.3535	22.035	0
	Zoo3_Sample4	0	0	9.31375	3.32674	6.57159	12.9286	49.7289
	Zoo9_Sample1	31.9451	0	13.8446	2.41747	0	32.4022	11.7826
	Zoo1_Sample6	9.85534	2.95059	15.0975	19.7955	11.9063	20.0662	7.67317
	Zoo1_Sample10	14.0985	0	2.82118	20.7701	9.3595	27.0196	0
	Mean	14.8015	0.248051	11.8948	8.89953	8.84274	23.2105	9.22439
	SD	9.86176	0.778569	7.32035	7.84859	6.25487	12.3628	21.5731
	CV	0.666269	3.13874	0.615425	0.881911	0.707345	0.532636	2.33871
n=25	Zoo5_Sample1	18.0217	0	19.8477	9.06588	8.70802	23.4263	0
	Zoo1_Sample20	5.30106	0	34.4342	3.75032	10.3621	11.9193	0
	Zoo2_Sample2	20.8796	0	6.78907	2.8608	2.65585	52.8693	0
	Zoo8_Sample1	24.9046	0	10.9713	13.5139	5.27872	33.6182	2.08031
	Zoo1_Sample14	0	0	11.5208	4.67791	10.0966	28.5054	0
	Zoo3_Sample11	20.9976	0	13.4318	17.8446	9.44508	16.3519	5.04622
	Zoo1_Sample5	21.6834	0	8.60972	9.18335	4.86024	27.4979	4.15102
	Zoo9_Sample1	31.9451	0	13.8446	2.41747	0	32.4022	11.7826
	Zoo1_Sample16	8.40676	2.01044	6.42199	15.3763	15.3535	22.035	0
	Zoo3_Sample1	36.5683	0	4.28251	4.1156	9.32329	32.4288	0
	Zoo5_Sample2	33.0951	0	5.4746	6.24543	2.44753	19.6084	0
	Zoo3_Sample10	17.9002	0	13.1193	11.8022	7.23693	28.7228	17.7924
	Zoo3_Sample8	23.402	0	14.9083	6.34679	13.5504	16.955	18.0122
	Zoo1_Sample18	0	0	34.6007	7.94056	19.1853	0	19.3797
	Zoo1_Sample2	5.38357	0	7.38396	0	2.31501	24.3542	5.06506
	Zoo4_Sample1	46.7605	0	0	5.99549	2.01461	25.9966	12.8935
	Zoo4_Sample5	12.8553	0	23.3883	13.1292	10.9164	18.749	14.6848
	Zoo8_Sample2	28.1024	0	4.55819	8.24485	3.38844	23.0943	2.83569
	Zoo3_Sample4	0	0	9.31375	3.32674	6.57159	12.9286	49.7289
	Zoo4_Sample7	0	0	3.30566	0	2.74395	0	87.9405
	Zoo1_Sample19	14.5455	0	4.51594	18.9906	6.82999	33.1523	2.46163
	Zoo1_Sample12	8.74408	0	0	0	4.56862	34.8926	0
	Zoo1_Sample1	10.8954	0	15.5891	6.40258	7.43424	28.2052	0
	Zoo1_Sample17	18.1025	0	0	13.6971	7.03163	35.6649	2.7076
	Zoo2_Sample3	18.4471	0	0	0	0	39.9004	6.33449
	Mean	17.0777	0.0804175	10.6525	7.39711	6.89272	24.9311	10.5159
	SD	12.3592	0.402087	9.47082	5.63189	4.74725	11.716	19.4866
	CV	0.723706	5	0.889073	0.761365	0.688735	0.469936	1.85307
	Zoo1_Sample11	10.5514	0	9.28603	4.80362	4.351	27.1086	0
	Zoo4_Sample7	0	0	3.30566	0	2.74395	0	87.9405
	Zoo1_Sample10	14.0985	0	2.82118	20.7701	9.3595	27.0196	0
	Zoo9_Sample1	31.9451	0	13.8446	2.41747	0	32.4022	11.7826
	Zoo7_Sample1	22.3407	0	17.1505	2.7623	10.6518	36.4914	0
	Zoo1_Sample6	9.85534	2.95059	15.0975	19.7955	11.9063	20.0662	7.67317
	Zoo3_Sample11	20.9976	0	13.4318	17.8446	9.44508	16.3519	5.04622
	Zoo1_Sample1	10.8954	0	15.5891	6.40258	7.43424	28.2052	0
	Zoo2_Sample3	18.4471	0	0	0	0	39.9004	6.33449
	Zoo1_Sample13	7.57555	0	16.5332	2.18633	8.28575	15.8648	0
	Zoo3_Sample7	5.83821	0	19.3415	11.9475	10.207	25.0108	18.6933
	Zoo3_Sample10	17.9002	0	13.1193	11.8022	7.23693	28.7228	17.7924
	Zoo3_Sample1	36.5683	0	4.28251	4.1156	9.32329	32.4288	0
	Zoo8_Sample2	28.1024	0	4.55819	8.24485	3.38844	23.0943	2.83569
	Zoo5_Sample2	33.0951	0	5.4746	6.24543	2.44753	19.6084	0
	Zoo8_Sample1	24.9046	0	10.9713	13.5139	5.27872	33.6182	2.08031
	Zoo1_Sample2	5.38357	0	7.38396	0	2.31501	24.3542	5.06506
	Zoo5_Sample1	18.0217	0	19.8477	9.06588	8.70802	23.4263	0
	Zoo9_Sample2	2.01794	13.3184	33.7724	25.5886	12.5673	0	3.78924
	Zoo1_Sample12	8.74408	0	0	0	4.56862	34.8926	0
	Zoo4_Sample6	17.9576	0	29.0042	21.0366	12.4116	5.75911	3.80011
	Zoo1_Sample16	8.40676	2.01044	6.42199	15.3763	15.3535	22.035	0
	Zoo3_Sample4	0	0	9.31375	3.32674	6.57159	12.9286	49.7289
	Zoo1_Sample4	18.1648	0	16.8101	11.3828	8.2815	29.4965	0
	Zoo4_Sample1	46.7605	0	0	5.99549	2.01461	25.9966	12.8935
	Mean	16.7429	0.731176	11.4944	8.98497	6.99405	23.3913	9.41822
	SD	11.932	2.71387	8.63398	7.60171	4.15287	10.4448	19.527
	CV	0.712663	3.71164	0.751144	0.846047	0.593773	0.446526	2.07332
	Zoo1_Sample10	14.0985	0	2.82118	20.7701	9.3595	27.0196	0
	Zoo1_Sample18	0	0	34.6007	7.94056	19.1853	0	19.3797
	Zoo1_Sample6	9.85534	2.95059	15.0975	19.7955	11.9063	20.0662	7.67317
	Zoo4_Sample4	10.1307	0	6.69409	15.0629	10.0194	31.7377	21.6844
	Zoo8_Sample1	24.9046	0	10.9713	13.5139	5.27872	33.6182	2.08031
	Zoo9_Sample2	2.01794	13.3184	33.7724	25.5886	12.5673	0	3.78924
	Zoo4_Sample2	4.68637	0	17.4117	15.2848	30.918	16.6787	12.6412
	Zoo5_Sample1	18.0217	0	19.8477	9.06588	8.70802	23.4263	0
	Zoo3_Sample9	7.132	3.566	10.5986	28.5923	13.7028	12.1829	9.27745
	Zoo1_Sample5	21.6834	0	8.60972	9.18335	4.86024	27.4979	4.15102
	Zoo1_Sample16	8.40676	2.01044	6.42199	15.3763	15.3535	22.035	0
	Zoo1_Sample3	11.5101	0	16.7594	20.2275	8.75241	14.2047	0
	Zoo9_Sample1	31.9451	0	13.8446	2.41747	0	32.4022	11.7826
	Zoo5_Sample2	33.0951	0	5.4746	6.24543	2.44753	19.6084	0
	Zoo1_Sample7	0	0	14.4518	0	9.11527	27.3056	4.54591
	Zoo8_Sample2	28.1024	0	4.55819	8.24485	3.38844	23.0943	2.83569
	Zoo2_Sample1	24.6186	0	0	4.0742	2.32316	29.0049	0
	Zoo1_Sample14	0	0	11.5208	4.67791	10.0966	28.5054	0
	Zoo2_Sample4	26.2541	0	10.9324	7.53135	14.1767	17.5504	7.66767
	Zoo2_Sample5	4.92072	0	45.9763	0	18.9012	9.63299	14.7026
	Zoo3_Sample5	22.619	0	20.1983	5.54406	8.34015	32.9275	0
	Zoo1_Sample1	10.8954	0	15.5891	6.40258	7.43424	28.2052	0
	Zoo2_Sample2	20.8796	0	6.78907	2.8608	2.65585	52.8693	0
	Zoo4_Sample3	8.14177	0	19.4756	17.4329	28.9327	6.45114	3.84101
	Zoo1_Sample9	8.63931	0	4.36285	2.11663	2.4622	25.1404	0
	Mean	14.1023	0.873816	14.2712	10.718	10.4354	22.4466	5.04208
	SD	10.3162	2.76703	10.7347	8.00598	7.79377	11.5638	6.48118
	CV	0.731524	3.1666	0.752194	0.746967	0.746857	0.515171	1.28542
