# Supplementary material for: Unraveling differences in fecal microbiota stability in mammals: from high variable carnivores and consistently stable herbivores
Source: Anim Microbiome. 2021 Nov 4;3:77. doi: 10.1186/s42523-021-00141-0 (PMC8567652; doi:10.1186/s42523-021-00141-0)
Supplement: Supplementary file 4 — Additional file 4. Statistical tests on alpha diversity between herbivores and carnivores. Results of the significance tests for richness, Shannon index and effective number of species tested on Canoidea, Feloidea, Perissodactyla and Ruminantia. Non-parametric Kruskal-Wallis rank sum test and post-hoc Dunn test were used to analyze for differences between those groups. [file 42523_2021_141_MOESM4_ESM.xlsx]

## Sheet: Statistic_alpha_diversity
Measurement	Richness
Test	Kruskal-Wallis rank sum test			Dunn (post-hoc)
Result	Kruskal-Wallis chi-squared	431.84		Comparison	Z	p.unadj	p.adj
	df	3		Canoidea-Feloidea	0.367	0.714	1
	p-value	<0.001		Canoidea-Perissodactyla	-14.47	<0.001	<0.001
				Feloidea-Perissodactyla	-14.823	<0.001	<0.001
				Canoidea-Ruminantia	-14.527	<0.001	<0.001
				Feloidea-Ruminantia	-14.912	<0.001	<0.001
				Perissodactyla-Ruminantia	0.943	0.345	1
Measurement	Shannon Index			Dunn (post-hoc)
Test	Kruskal-Wallis rank sum test			Comparison	Z	p.unadj	p.adj
Result	Kruskal-Wallis chi-squared	425.99		Canoidea-Feloidea	-0.72	0.471	1
	df	3		Canoidea-Perissodactyla	-14.67	<0.001	<0.001
	p-value	<0.001		Feloidea-Perissodactyla	-14.128	<0.001	<0.001
				Canoidea-Ruminantia	-15.042	<0.001	<0.001
				Feloidea-Ruminantia	-14.433	<0.001	<0.001
				Perissodactyla-Ruminantia	0.709	0.478	1
Measurement	ENS			Dunn (post-hoc)
Test	Kruskal-Wallis rank sum test	425.99		Comparison	Z	p.unadj	p.adj
Result	Kruskal-Wallis chi-squared	3		Canoidea-Feloidea	-0.72	0.471	1
	df	<0.001		Canoidea-Perissodactyla	-14.67	<0.001	<0.001
	p-value			Feloidea-Perissodactyla	-14.128	<0.001	<0.001
				Canoidea-Ruminantia	-15.042	<0.001	<0.001
				Feloidea-Ruminantia	-14.433	<0.001	<0.001
				Perissodactyla-Ruminantia	0.709	0.478	1
Measurement	Shannon Index			Dunn (post-hoc)
Test	Kruskal-Wallis rank sum test			Comparison	Z	p.unadj	p.adj
Result	Kruskal-Wallis chi-squared	97.855		African_wild_dog - Arctic_fox	-1.006	0.314	1
	df	8		African_wild_dog - Bat-eared_fox	-0.08	0.936	1
	p-value	<0.001		Arctic_fox - Bat-eared_fox	0.906	0.365	1
				African_wild_dog - Brown_bear	4.756	<0.001	<0.001
				Arctic_fox - Brown_bear	5.527	<0.001	<0.001
				Bat-eared_fox - Brown_bear	4.691	<0.001	<0.001
				African_wild_dog - Bush_dog	2.083	0.03	1
				Arctic_fox - Bush_dog	3.027	0.002	0.089
				Bat-eared_fox - Bush_dog	2.105	0.04	1
				Brown_bear - Bush_dog	-2.937	0.003	0.119
				African_wild_dog - Fennec_fox	-1.619	0.106	1
				Arctic_fox - Fennec_fox	-0.521	0.603	1
				Bat-eared_fox - Fennec_fox	-1.495	0.135	1
				Brown_bear - Fennec_fox	-6.541	<0.001	<0.001
				Bush_dog - Fennec_fox	-3.844	<0.001	0.004
				African_wild_dog - Maned_wolf	3.653	<0.001	0.009
				Arctic_fox - Maned_wolf	4.41	<0.001	<0.001
				Bat-eared_fox - Maned_wolf	3.644	<0.001	0.009
				Brown_bear - Maned_wolf	-0.37	0.712	1
				Bush_dog - Maned_wolf	2.02	0.043	1
				Fennec_fox - Maned_wolf	5.152	<0.001	<0.001
				African_wild_dog - Polar_bear	2.901	0.004	0.134
				Arctic_fox - Polar_bear	3.555	<0.001	0.014
				Bat-eared_fox - Polar_bear	2.918	0.004	0.127
				Brown_bear - Polar_bear	-0.216	0.829	1
				Bush_dog - Polar_bear	1.587	0.112	1
				Fennec_fox - Polar_bear	4.066	<0.001	0.002
				Maned_wolf - Polar_bear	0.057	0.955	1
				African_wild_dog - Red_Panda	3.928	<0.001	0.003
				Arctic_fox - Red_Panda	4.758	<0.001	<0.001
				Bat-eared_fox - Red_Panda	3.889	<0.001	0.004
				Brown_bear - Red_Panda	-0.97	0.332	1
				Bush_dog - Red_Panda	2.006	0.049	1
				Fennec_fox - Red_Panda	5.724	<0.001	<0.001
				Maned_wolf - Red_Panda	-0.41	0.681	1
				Polar_bear - Red_Panda	-0.37	0.712	1
Measurement	Shannon Index			Dunn (post-hoc)
Test	Kruskal-Wallis rank sum test			Comparison	Z	p.unadj	p.adj
Result	Kruskal-Wallis chi-squared	10.866		Cheetah - Clouded_leopard	-0.312	0.755	1
	df	8		Cheetah - Fossa	-1.929	0.054	1
	p-value	0.209		Clouded_leopard - Fossa	-1.463	0.143	1
				Cheetah - Jaguar	0.659	0.51	1
				Clouded_leopard - Jaguar	0.828	0.408	1
				Fossa - Jaguar	2.166	0.03	1
				Cheetah - Leopard	-0.052	0.958	1
				Clouded_leopard - Leopard	0.204	0.839	1
				Fossa - Leopard	1.567	0.117	1
				Jaguar - Leopard	-0.58	0.562	1
				Cheetah - Lion	0.283	0.777	1
				Clouded_leopard - Lion	0.54	0.589	1
				Fossa - Lion	2.141	0.032	1
				Jaguar - Lion	-0.454	0.65	1
				Leopard - Lion	0.256	0.798	1
				Cheetah - Snow_leopard	0.754	0.451	1
				Clouded_leopard - Snow_leopard	0.914	0.361	1
				Fossa - Snow_leopard	2.381	0.017	0.622
				Jaguar - Snow_leopard	-0.027	0.978	1
				Leopard - Snow_leopard	0.623	0.534	1
				Lion - Snow_leopard	0.511	0.61	1
				Cheetah - Surricate	-3.281	0.001	0.037
				Clouded_leopard - Surricate	-2.402	0.016	0.587
				Fossa - Surricate	-0.551	0.581	1
				Jaguar - Surricate	-3.184	0.001	0.052
				Leopard - Surricate	-2.431	0.015	0.542
				Lion - Surricate	-3.585	0	0.012
				Snow_leopard - Surricate	-3.698	0	0.008
				Cheetah - Tiger	-0.173	0.863	1
				Clouded_leopard - Tiger	0.207	0.836	1
				Fossa - Tiger	1.933	0.053	1
				Jaguar - Tiger	-0.827	0.408	1
				Leopard - Tiger	-0.062	0.951	1
				Lion - Tiger	-0.499	0.617	1
				Snow_leopard - Tiger	-0.985	0.325	1
				Surricate - Tiger	3.487	0	0.018
Measurement	Shannon Index			Dunn (post-hoc)
Test	Kruskal-Wallis rank sum test			Comparison	Z	p.unadj	p.adj
Result	Kruskal-Wallis chi-squared	12.192		Bongo - Common_eland	3.271	0.001	0.023
	df	6		Bongo - Giraffe	1.858	0.063	1
	p-value	0.058		Common_eland - Giraffe	-2.198	0.028	0.587
				Bongo - Okapi	1.46	0.144	1
				Common_eland - Okapi	-2.24	0.025	0.526
				Giraffe - Okapi	-0.372	0.71	1
				Bongo - Reindeer	2.205	0.027	0.577
				Common_eland - Reindeer	-0.404	0.686	1
				Giraffe - Reindeer	0.972	0.331	1
				Okapi - Reindeer	1.156	0.248	1
				Bongo - Watussi	1.911	0.056	1
				Common_eland - Watussi	-1.618	0.106	1
				Giraffe - Watussi	0.269	0.788	1
				Okapi - Watussi	0.565	0.572	1
				Reindeer - Watussi	-0.729	0.466	1
				Bongo - Wildebeest	1.298	0.194	1
				Common_eland - Wildebeest	-3.418	0.001	0.013
				Giraffe - Wildebeest	-1.056	0.291	1
				Okapi - Wildebeest	-0.465	0.642	1
				Reindeer - Wildebeest	-1.601	0.109	1
				Watussi - Wildebeest	-1.154	0.249	1
Measurement	Shannon Index			Dunn (post-hoc)
Test	Kruskal-Wallis rank sum test			Comparison	Z	p.unadj	p.adj
Result	Kruskal-Wallis chi-squared	39.173		Black_rhinoceros - Grevys_zebra	-3.335	0.009	0.013
	df	5		Black_rhinoceros - Mountain_zebra	-5.204	<0.001	<0.001
	p-value	<0.001		Grevys_zebra - Mountain_zebra	-2.257	0.024	0.36
				Black_rhinoceros - Plains_zebra	-2.902	0.003	0.056
				Grevys_zebra - Plains_zebra	0.929	0.353	1
				Mountain_zebra - Plains_zebra	3.431	0.006	0.009
				Black_rhinoceros - Tapir	-0.262	0.794	1
				Grevys_zebra - Tapir	2.157	0.031	0.465
				Mountain_zebra - Tapir	3.583	0.003	0.005
				Plains_zebra - Tapir	1.727	0.084	1
				Black_rhinoceros - White_rhinoceros	-0.973	0.331	1
				Grevys_zebra - White_rhinoceros	2.396	0.017	0.248
				Mountain_zebra - White_rhinoceros	4.376	<0.001	<0.001
				Plains_zebra - White_rhinoceros	1.85	0.064	0.964
				Tapir - White_rhinoceros	-0.467	0.641	1
